# Supplementary material for: The metabolic change in serum lysoglycerophospholipids intervened by triterpenoid saponins from Kuding tea on hyperlipidemic mice
Source: Royal Society of Chemistry journal article supplement (doi:10.1039/c9fo02142f), 2019-01-01
Supplement: c9fo02142f1.pdf [file c9fo02142f1.pdf]

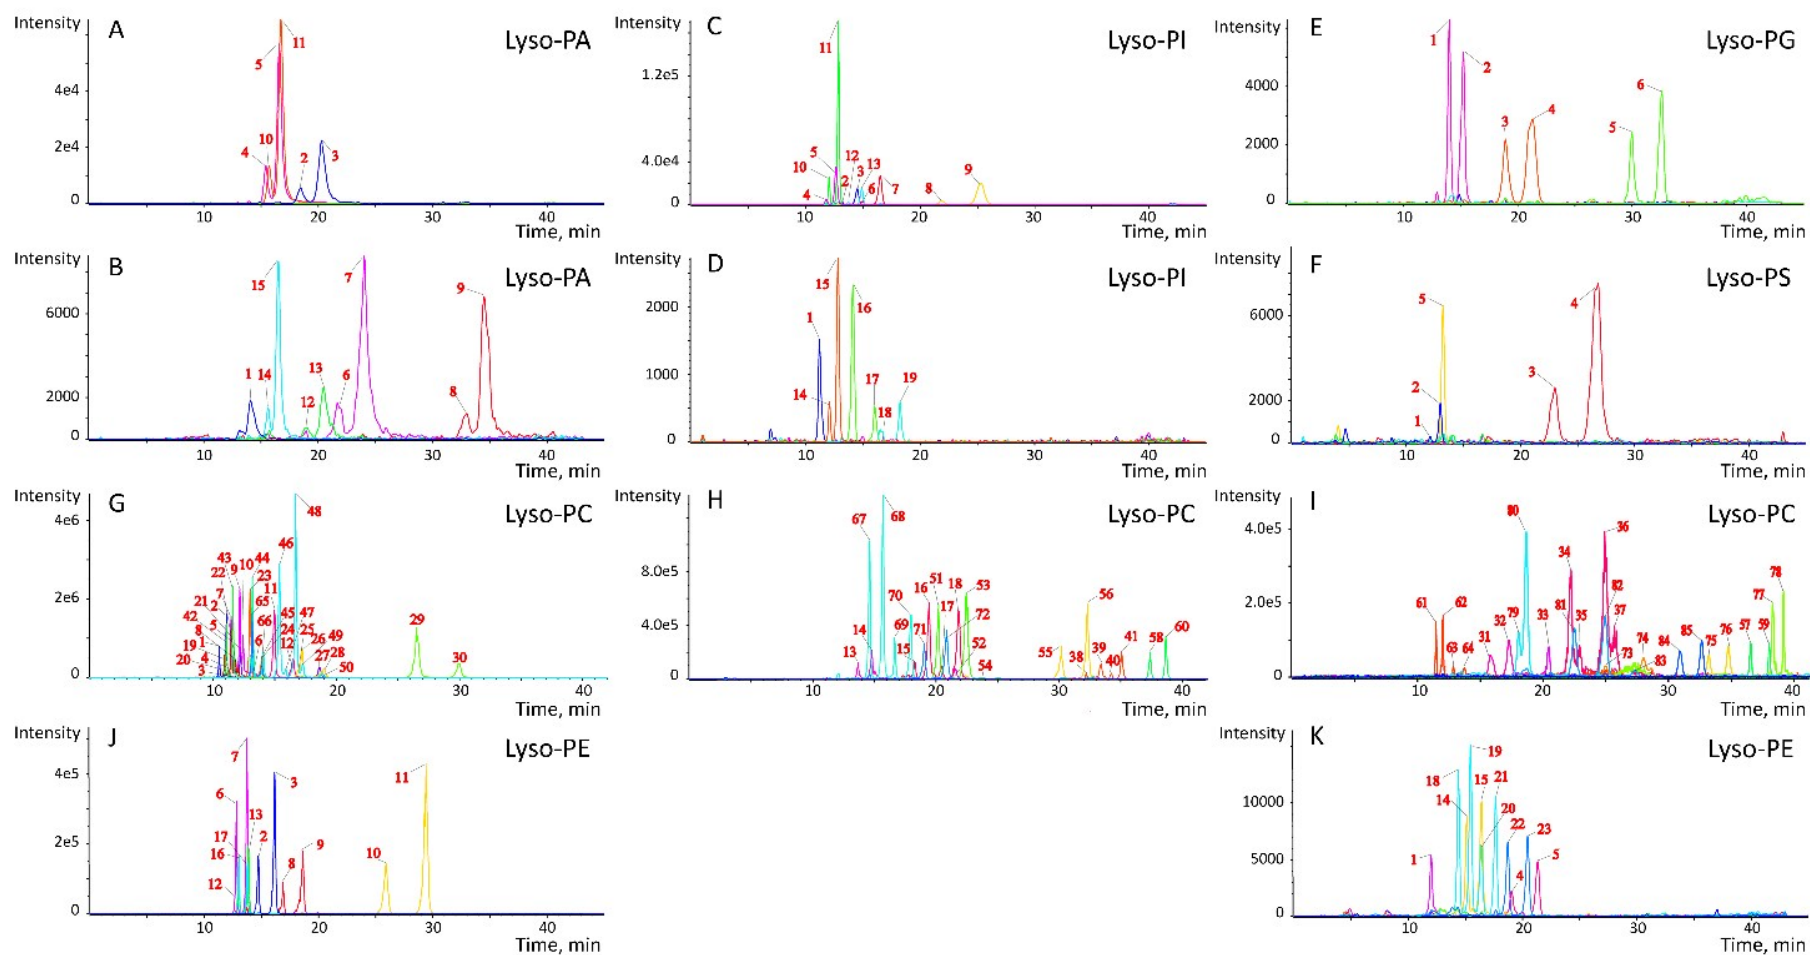

**Figure S1.** The established metabolite profile of endogenous Lyso-GPL. The extracted ion chromatograms were extracted individually according to the different peak intensities to clearly display all of the peaks from the LC-QTRAP-MRM analysis.
