# Supplementary material for: The metabolic change in serum lysoglycerophospholipids intervened by triterpenoid saponins from Kuding tea on hyperlipidemic mice
Source: Royal Society of Chemistry journal article supplement (doi:10.1039/c9fo02142f), 2019-01-01
Supplement: c9fo02142f2.pdf [file c9fo02142f2.pdf]

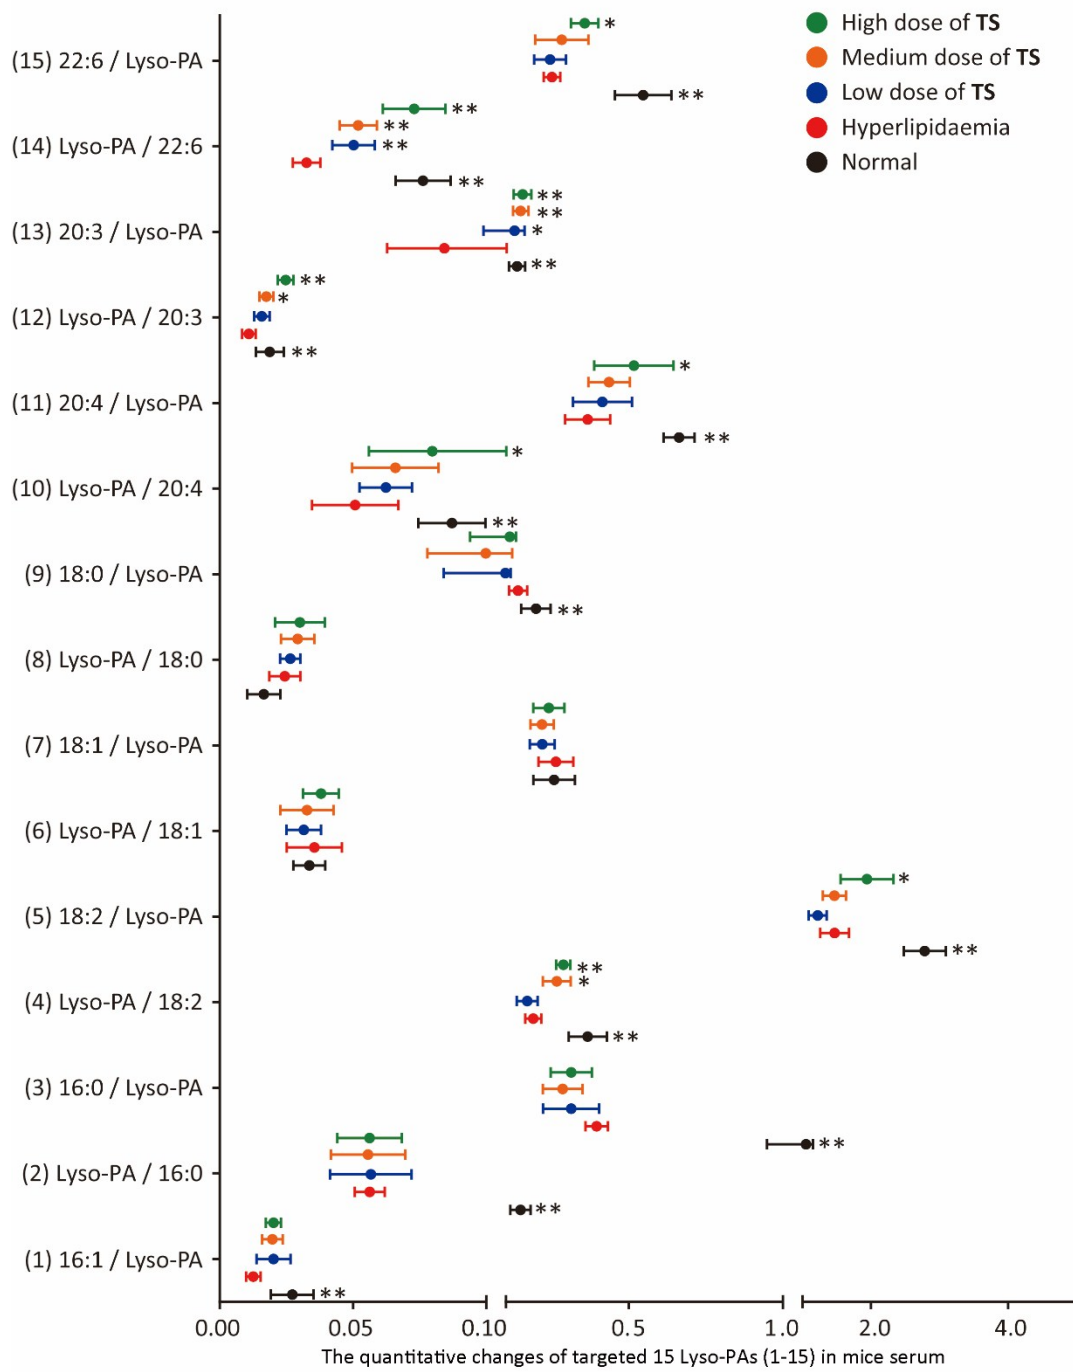

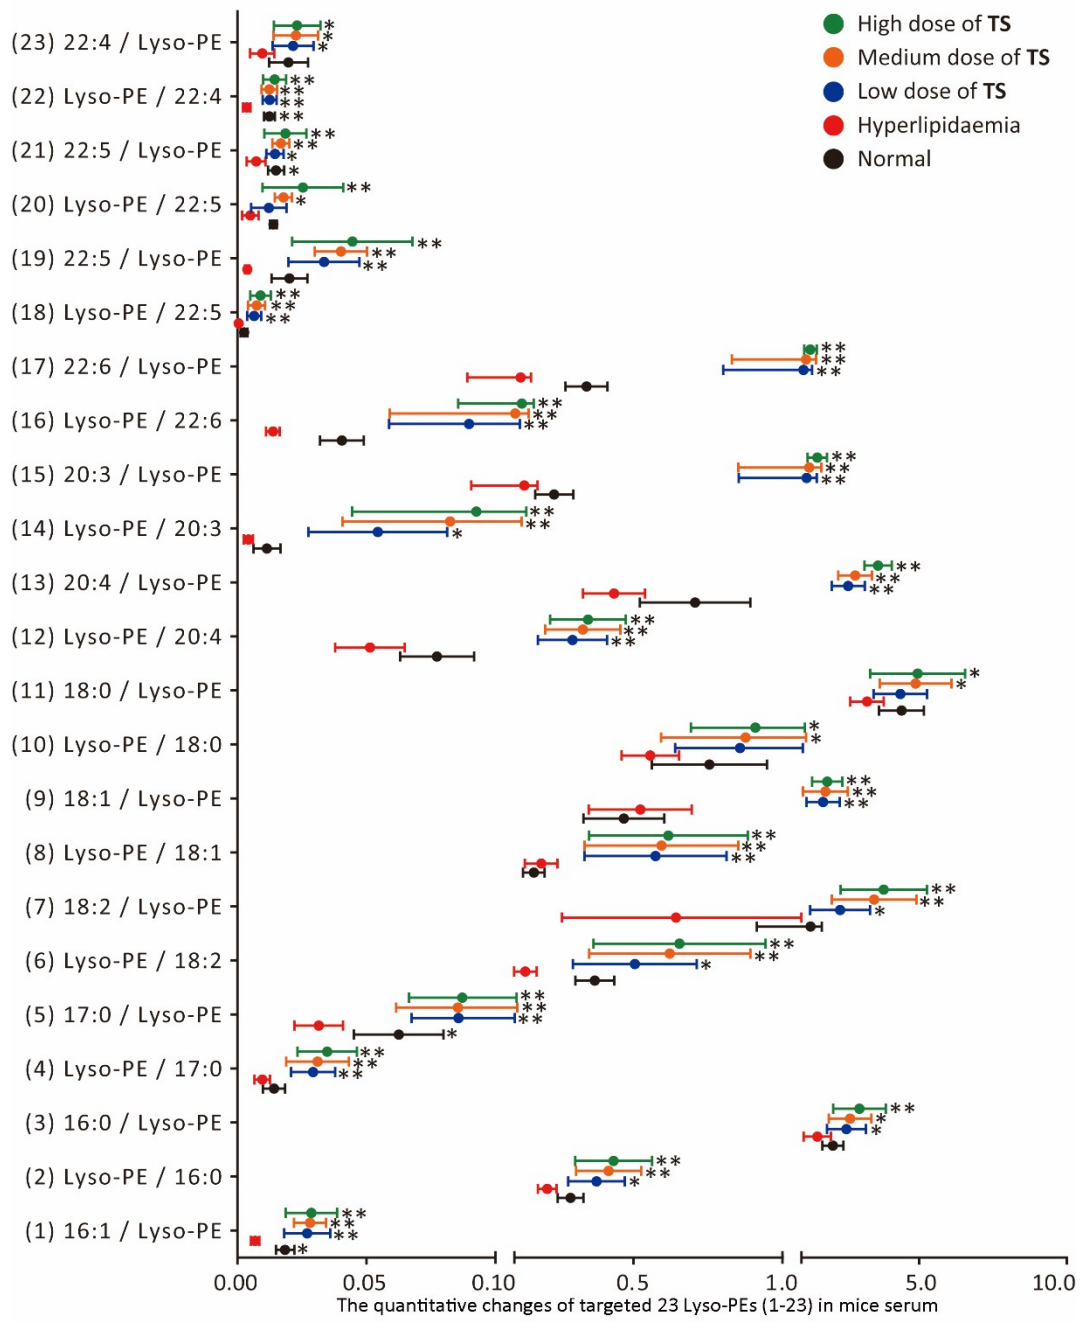

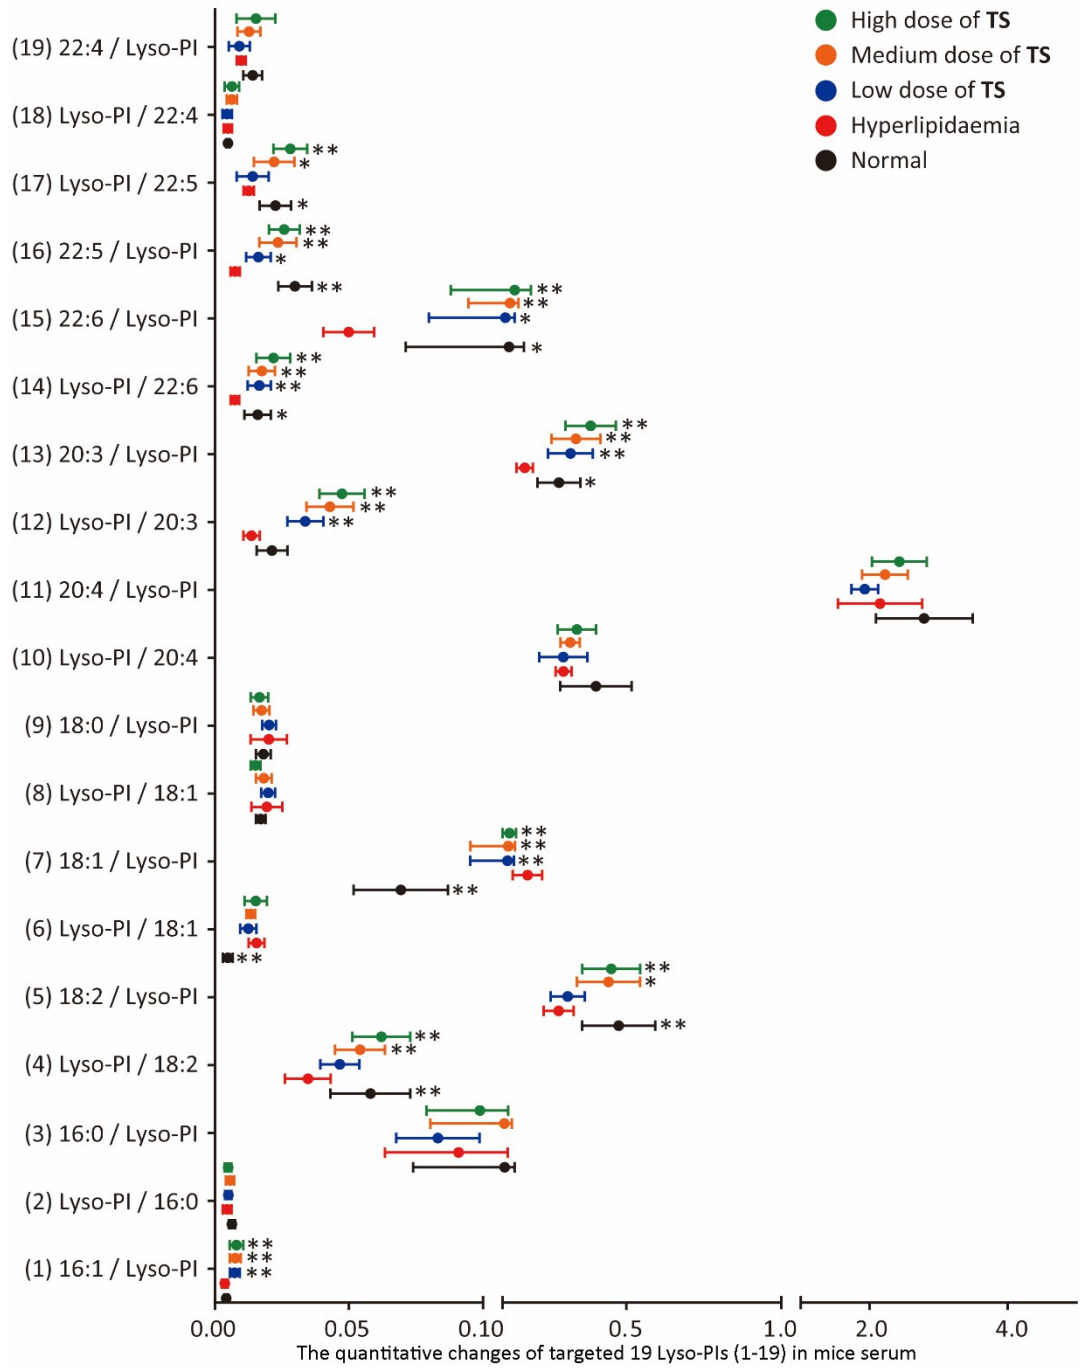

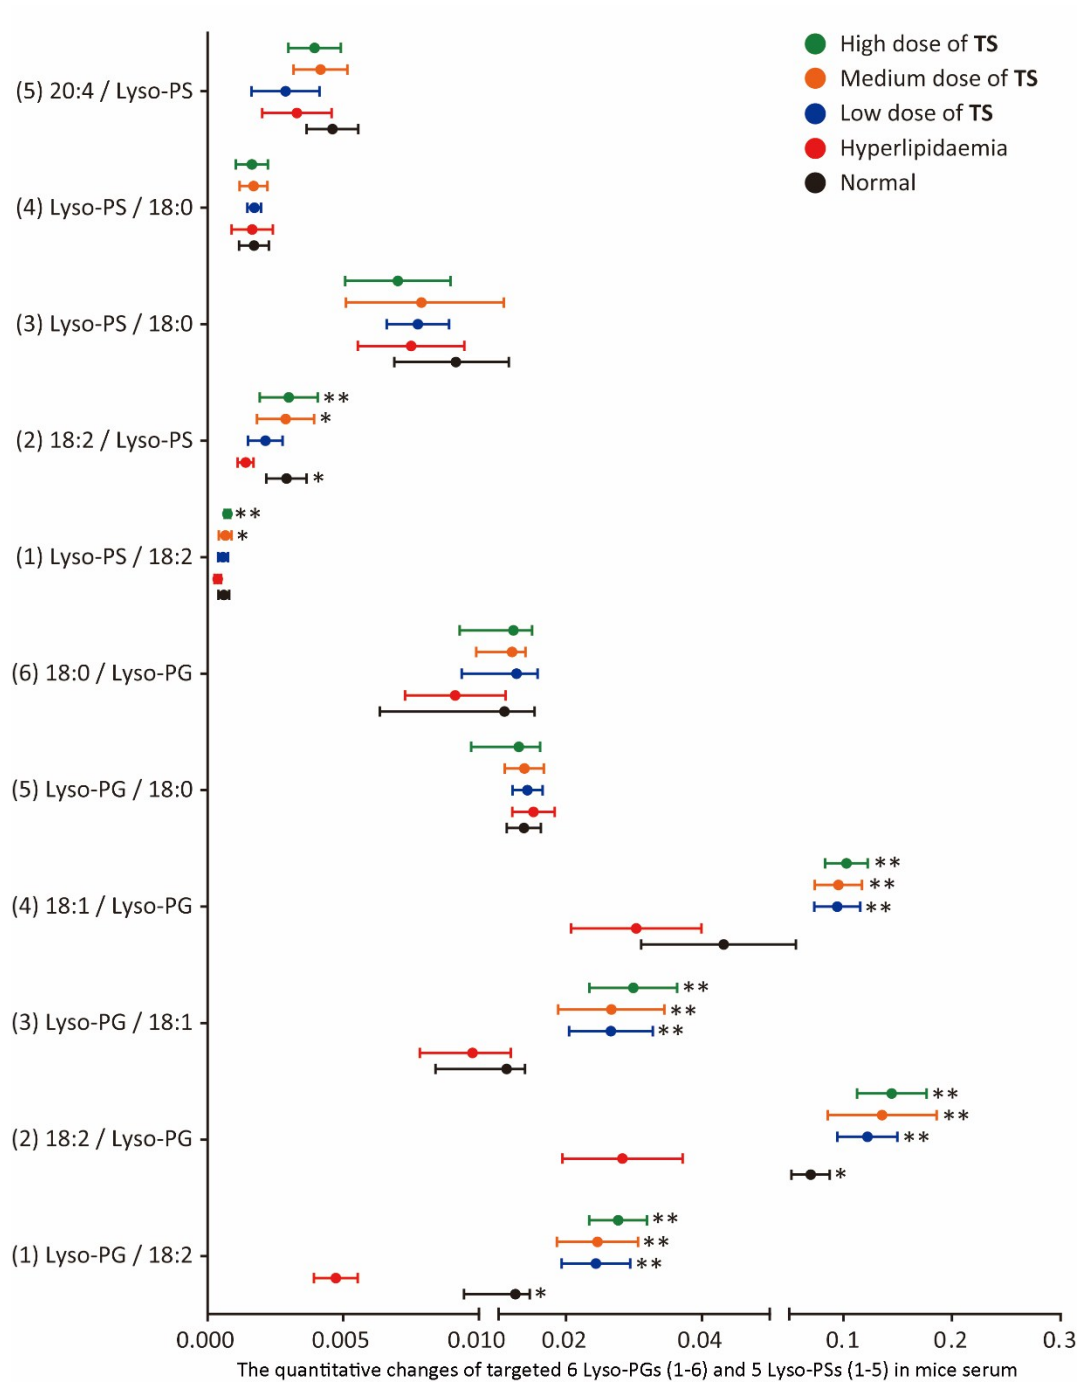

**Figure S2.** The quantitative changes of targeted Lyso-PAs, Lyso-PEs, Lyso-PGs, Lyso-PSs and Lyso-PIs in mice serum.
