# Supplementary material for: The metabolic change in serum lysoglycerophospholipids intervened by triterpenoid saponins from Kuding tea on hyperlipidemic mice
Source: Royal Society of Chemistry journal article supplement (doi:10.1039/c9fo02142f), 2019-01-01
Supplement: c9fo02142f4.pdf [file c9fo02142f4.pdf]

**Table S1.1. The qualitative analysis of Lyso-PC, Lyso-PE and Lyso-PS in mice serum by positive LC-MS/MS.**

| No.                                      | RT (min) | Structures   | RDB | Formula                                           | Q1    | Q3          |
|------------------------------------------|----------|--------------|-----|---------------------------------------------------|-------|-------------|
| <b>Lysophosphatidylcholine (Lyso-PC)</b> |          |              |     |                                                   |       |             |
| 1                                        | 10.47    | Lyso-PC/14:0 | 1   | C <sub>22</sub> H <sub>47</sub> NO <sub>7</sub> P | 468.3 | 104.1/184.1 |
| 2                                        | 11.05    | 14:0/Lyso-PC | 1   | C <sub>22</sub> H <sub>47</sub> NO <sub>7</sub> P | 468.3 | 104.1/184.1 |
| 3                                        | 11.78    | Lyso-PC/15:0 | 2   | C <sub>23</sub> H <sub>49</sub> NO <sub>7</sub> P | 482.3 | 104.1/184.1 |
| 4                                        | 12.2     | Lyso-PC/15:0 | 2   | C <sub>23</sub> H <sub>49</sub> NO <sub>7</sub> P | 482.3 | 104.1/184.1 |
| 5                                        | 12.61    | 15:0/Lyso-PC | 2   | C <sub>23</sub> H <sub>49</sub> NO <sub>7</sub> P | 482.3 | 104.1/184.1 |
| 6                                        | 13.14    | Lyso-PC/15:0 | 2   | C <sub>23</sub> H <sub>49</sub> NO <sub>7</sub> P | 482.3 | 104.1/184.1 |
| 7                                        | 11.48    | Lyso-PC/16:1 | 2   | C <sub>24</sub> H <sub>49</sub> NO <sub>7</sub> P | 494.3 | 104.1/184.1 |
| 8                                        | 11.70    | Lyso-PC/16:1 | 2   | C <sub>24</sub> H <sub>49</sub> NO <sub>7</sub> P | 494.3 | 104.1/184.1 |
| 9                                        | 12.20    | 16:1/Lyso-PC | 2   | C <sub>24</sub> H <sub>49</sub> NO <sub>7</sub> P | 494.3 | 104.1/184.1 |
| 10                                       | 12.44    | 16:1/Lyso-PC | 2   | C <sub>24</sub> H <sub>49</sub> NO <sub>7</sub> P | 494.3 | 104.1/184.1 |
| 11                                       | 14.94    | Lyso-PC/16:0 | 1   | C <sub>24</sub> H <sub>51</sub> NO <sub>7</sub> P | 496.3 | 104.1/184.1 |
| 12                                       | 16.46    | 16:0/Lyso-PC | 1   | C <sub>24</sub> H <sub>51</sub> NO <sub>7</sub> P | 496.3 | 104.1/184.1 |
| 13                                       | 13.67    | Lyso-PC/17:1 | 2   | C <sub>25</sub> H <sub>51</sub> NO <sub>7</sub> P | 508.3 | 104.1/184.1 |
| 14                                       | 14.77    | 17:1/Lyso-PC | 2   | C <sub>25</sub> H <sub>51</sub> NO <sub>7</sub> P | 508.3 | 104.1/184.1 |
| 15                                       | 18.27    | Lyso-PC/17:0 | 1   | C <sub>25</sub> H <sub>53</sub> NO <sub>7</sub> P | 510.4 | 104.1/184.1 |
| 16                                       | 19.42    | 17:0/Lyso-PC | 1   | C <sub>25</sub> H <sub>53</sub> NO <sub>7</sub> P | 510.4 | 104.1/184.1 |
| 17                                       | 20.44    | 17:0/Lyso-PC | 1   | C <sub>25</sub> H <sub>53</sub> NO <sub>7</sub> P | 510.4 | 104.1/184.1 |
| 18                                       | 21.83    | 17:0/Lyso-PC | 1   | C <sub>25</sub> H <sub>53</sub> NO <sub>7</sub> P | 510.4 | 104.1/184.1 |
| 19                                       | 10.91    | Lyso-PC/18:3 | 4   | C <sub>26</sub> H <sub>49</sub> NO <sub>7</sub> P | 518.3 | 104.1/184.1 |
| 20                                       | 11.25    | Lyso-PC/18:3 | 4   | C <sub>26</sub> H <sub>49</sub> NO <sub>7</sub> P | 518.3 | 104.1/184.1 |
| 21                                       | 11.47    | 18:3/Lyso-PC | 4   | C <sub>26</sub> H <sub>49</sub> NO <sub>7</sub> P | 518.3 | 104.1/184.1 |
| 22                                       | 11.85    | 18:3/Lyso-PC | 4   | C <sub>26</sub> H <sub>49</sub> NO <sub>7</sub> P | 518.3 | 104.1/184.1 |
| 23                                       | 12.99    | Lyso-PC/18:2 | 3   | C <sub>26</sub> H <sub>51</sub> NO <sub>7</sub> P | 520.3 | 104.1/184.1 |
| 24                                       | 13.94    | 18:2/Lyso-PC | 3   | C <sub>26</sub> H <sub>51</sub> NO <sub>7</sub> P | 520.3 | 104.1/184.1 |
| 25                                       | 16.88    | Lyso-PC/18:1 | 2   | C <sub>26</sub> H <sub>53</sub> NO <sub>7</sub> P | 522.4 | 104.1/184.1 |
| 26                                       | 17.20    | Lyso-PC/18:1 | 2   | C <sub>26</sub> H <sub>53</sub> NO <sub>7</sub> P | 522.4 | 104.1/184.1 |
| 27                                       | 18.63    | 18:1/Lyso-PC | 2   | C <sub>26</sub> H <sub>53</sub> NO <sub>7</sub> P | 522.4 | 104.1/184.1 |
| 28                                       | 18.95    | 18:1/Lyso-PC | 2   | C <sub>26</sub> H <sub>53</sub> NO <sub>7</sub> P | 522.4 | 104.1/184.1 |
| 29                                       | 26.57    | Lyso-PC/18:0 | 1   | C <sub>26</sub> H <sub>55</sub> NO <sub>7</sub> P | 524.4 | 104.1/184.1 |
| 30                                       | 29.97    | 18:0/Lyso-PC | 1   | C <sub>26</sub> H <sub>55</sub> NO <sub>7</sub> P | 524.4 | 104.1/184.1 |
| 31                                       | 15.80    | Lyso-PC/19:2 | 3   | C <sub>27</sub> H <sub>53</sub> NO <sub>7</sub> P | 534.4 | 104.1/184.1 |
| 32                                       | 17.26    | 19:2/Lyso-PC | 3   | C <sub>27</sub> H <sub>53</sub> NO <sub>7</sub> P | 534.4 | 104.1/184.1 |
| 33                                       | 20.78    | 19:2/Lyso-PC | 3   | C <sub>27</sub> H <sub>53</sub> NO <sub>7</sub> P | 534.4 | 104.1/184.1 |
| 34                                       | 22.17    | Lyso-PC/19:1 | 2   | C <sub>27</sub> H <sub>55</sub> NO <sub>7</sub> P | 536.4 | 104.1/184.1 |
| 35                                       | 22.87    | Lyso-PC/19:1 | 2   | C <sub>27</sub> H <sub>55</sub> NO <sub>7</sub> P | 536.4 | 104.1/184.1 |
| 36                                       | 24.95    | 19:1/Lyso-PC | 2   | C <sub>27</sub> H <sub>55</sub> NO <sub>7</sub> P | 536.4 | 104.1/184.1 |
| 37                                       | 25.73    | 19:1/Lyso-PC | 2   | C <sub>27</sub> H <sub>55</sub> NO <sub>7</sub> P | 536.4 | 104.1/184.1 |
| 38                                       | 32.31    | Lyso-PC/19:0 | 1   | C <sub>27</sub> H <sub>57</sub> NO <sub>7</sub> P | 538.4 | 104.1/184.1 |
| 39                                       | 33.44    | Lyso-PC/19:0 | 1   | C <sub>27</sub> H <sub>57</sub> NO <sub>7</sub> P | 538.4 | 104.1/184.1 |

|    |       |              |   |                                                   |       |             |
|----|-------|--------------|---|---------------------------------------------------|-------|-------------|
| 40 | 34.15 | 19:0/Lyso-PC | 1 | C <sub>27</sub> H <sub>57</sub> NO <sub>7</sub> P | 538.4 | 104.1/184.1 |
| 41 | 35.11 | 19:0/Lyso-PC | 1 | C <sub>27</sub> H <sub>57</sub> NO <sub>7</sub> P | 538.4 | 104.1/184.1 |
| 42 | 11.08 | Lyso-PC/20:5 | 6 | C <sub>28</sub> H <sub>49</sub> NO <sub>7</sub> P | 542.3 | 104.1/184.1 |
| 43 | 11.60 | 20:5/Lyso-PC | 6 | C <sub>28</sub> H <sub>49</sub> NO <sub>7</sub> P | 542.3 | 104.1/184.1 |
| 44 | 13.17 | Lyso-PC/20:4 | 5 | C <sub>28</sub> H <sub>51</sub> NO <sub>7</sub> P | 544.3 | 104.1/184.1 |
| 45 | 14.05 | 20:4/Lyso-PC | 5 | C <sub>28</sub> H <sub>51</sub> NO <sub>7</sub> P | 544.3 | 104.1/184.1 |
| 46 | 15.33 | Lyso-PC/20:3 | 4 | C <sub>28</sub> H <sub>53</sub> NO <sub>7</sub> P | 546.4 | 104.1/184.1 |
| 47 | 15.86 | Lyso-PC/20:3 | 4 | C <sub>28</sub> H <sub>53</sub> NO <sub>7</sub> P | 546.4 | 104.1/184.1 |
| 48 | 16.67 | 20:3/Lyso-PC | 4 | C <sub>28</sub> H <sub>53</sub> NO <sub>7</sub> P | 546.4 | 104.1/184.1 |
| 49 | 17.26 | 20:3/Lyso-PC | 4 | C <sub>28</sub> H <sub>53</sub> NO <sub>7</sub> P | 546.4 | 104.1/184.1 |
| 50 | 18.83 | 20:3/Lyso-PC | 4 | C <sub>28</sub> H <sub>53</sub> NO <sub>7</sub> P | 546.4 | 104.1/184.1 |
| 51 | 20.19 | Lyso-PC/20:2 | 3 | C <sub>28</sub> H <sub>55</sub> NO <sub>7</sub> P | 548.4 | 104.1/184.1 |
| 52 | 21.39 | Lyso-PC/20:2 | 3 | C <sub>28</sub> H <sub>55</sub> NO <sub>7</sub> P | 548.4 | 104.1/184.1 |
| 53 | 22.46 | 20:2/Lyso-PC | 3 | C <sub>28</sub> H <sub>55</sub> NO <sub>7</sub> P | 548.4 | 104.1/184.1 |
| 54 | 23.75 | 20:2/Lyso-PC | 3 | C <sub>28</sub> H <sub>55</sub> NO <sub>7</sub> P | 548.4 | 104.1/184.1 |
| 55 | 30.14 | Lyso-PC/20:1 | 2 | C <sub>28</sub> H <sub>57</sub> NO <sub>7</sub> P | 550.4 | 104.1/184.1 |
| 56 | 32.29 | 20:1/Lyso-PC | 2 | C <sub>28</sub> H <sub>57</sub> NO <sub>7</sub> P | 550.4 | 104.1/184.1 |
| 57 | 36.6  | Lyso-PC/20:0 | 1 | C <sub>28</sub> H <sub>59</sub> NO <sub>7</sub> P | 552.4 | 104.1/184.1 |
| 58 | 37.41 | Lyso-PC/20:0 | 1 | C <sub>28</sub> H <sub>59</sub> NO <sub>7</sub> P | 552.4 | 104.1/184.1 |
| 59 | 37.97 | 20:0/Lyso-PC | 1 | C <sub>28</sub> H <sub>59</sub> NO <sub>7</sub> P | 552.4 | 104.1/184.1 |
| 60 | 38.70 | 20:0/Lyso-PC | 1 | C <sub>28</sub> H <sub>59</sub> NO <sub>7</sub> P | 552.4 | 104.1/184.1 |
| 61 | 11.47 | Lyso-PC/22:7 | 8 | C <sub>30</sub> H <sub>49</sub> NO <sub>7</sub> P | 566.3 | 104.1/184.1 |
| 62 | 12.00 | 22:7/Lyso-PC | 8 | C <sub>30</sub> H <sub>49</sub> NO <sub>7</sub> P | 566.3 | 104.1/184.1 |
| 63 | 12.80 | Lyso-PC/22:7 | 8 | C <sub>30</sub> H <sub>49</sub> NO <sub>7</sub> P | 566.3 | 104.1/184.1 |
| 64 | 13.57 | 22:7/Lyso-PC | 8 | C <sub>30</sub> H <sub>49</sub> NO <sub>7</sub> P | 566.3 | 104.1/184.1 |
| 65 | 13.19 | Lyso-PC/22:6 | 7 | C <sub>30</sub> H <sub>51</sub> NO <sub>7</sub> P | 568.3 | 104.1/184.1 |
| 66 | 13.99 | 22:6/Lyso-PC | 7 | C <sub>30</sub> H <sub>51</sub> NO <sub>7</sub> P | 568.3 | 104.1/184.1 |
| 67 | 14.65 | Lyso-PC/22:5 | 6 | C <sub>30</sub> H <sub>53</sub> NO <sub>7</sub> P | 570.4 | 104.1/184.1 |
| 68 | 15.71 | 22:5/Lyso-PC | 6 | C <sub>30</sub> H <sub>53</sub> NO <sub>7</sub> P | 570.4 | 104.1/184.1 |
| 69 | 16.68 | Lyso-PC/22:5 | 6 | C <sub>30</sub> H <sub>53</sub> NO <sub>7</sub> P | 570.4 | 104.1/184.1 |
| 70 | 17.98 | 22:5/Lyso-PC | 6 | C <sub>30</sub> H <sub>53</sub> NO <sub>7</sub> P | 570.4 | 104.1/184.1 |
| 71 | 19.06 | Lyso-PC/22:4 | 5 | C <sub>30</sub> H <sub>55</sub> NO <sub>7</sub> P | 572.4 | 104.1/184.1 |
| 72 | 20.89 | 22:4/Lyso-PC | 5 | C <sub>30</sub> H <sub>55</sub> NO <sub>7</sub> P | 572.4 | 104.1/184.1 |
| 73 | 24.99 | Lyso-PC/22:3 | 4 | C <sub>30</sub> H <sub>57</sub> NO <sub>7</sub> P | 574.4 | 104.1/184.1 |
| 74 | 28.00 | 22:3/Lyso-PC | 4 | C <sub>30</sub> H <sub>57</sub> NO <sub>7</sub> P | 574.4 | 104.1/184.1 |
| 75 | 33.26 | Lyso-PC/22:2 | 3 | C <sub>30</sub> H <sub>59</sub> NO <sub>7</sub> P | 576.4 | 104.1/184.1 |
| 76 | 34.79 | 22:2/Lyso-PC | 3 | C <sub>30</sub> H <sub>59</sub> NO <sub>7</sub> P | 576.4 | 104.1/184.1 |
| 77 | 38.32 | Lyso-PC/22:1 | 2 | C <sub>30</sub> H <sub>61</sub> NO <sub>7</sub> P | 578.4 | 104.1/184.1 |
| 78 | 39.18 | 22:1/Lyso-PC | 2 | C <sub>30</sub> H <sub>61</sub> NO <sub>7</sub> P | 578.4 | 104.1/184.1 |
| 79 | 18.05 | Lyso-PC/24:6 | 7 | C <sub>32</sub> H <sub>55</sub> NO <sub>7</sub> P | 596.4 | 104.1/184.1 |
| 80 | 18.66 | 24:6/Lyso-PC | 7 | C <sub>32</sub> H <sub>55</sub> NO <sub>7</sub> P | 596.4 | 104.1/184.1 |
| 81 | 22.51 | Lyso-PC/24:5 | 6 | C <sub>32</sub> H <sub>57</sub> NO <sub>7</sub> P | 598.4 | 104.1/184.1 |

|    |       |              |   |                                                   |       |             |
|----|-------|--------------|---|---------------------------------------------------|-------|-------------|
| 82 | 24.95 | 24:5/Lyso-PC | 6 | C <sub>32</sub> H <sub>57</sub> NO <sub>7</sub> P | 598.4 | 104.1/184.1 |
| 83 | 27.34 | 24:5/Lyso-PC | 6 | C <sub>32</sub> H <sub>57</sub> NO <sub>7</sub> P | 598.4 | 104.1/184.1 |
| 84 | 30.91 | Lyso-PC/24:4 | 5 | C <sub>32</sub> H <sub>59</sub> NO <sub>7</sub> P | 600.4 | 104.1/184.1 |
| 85 | 32.66 | 24:4/Lyso-PC | 5 | C <sub>32</sub> H <sub>59</sub> NO <sub>7</sub> P | 600.4 | 104.1/184.1 |

#### **Lysophosphatidylethanolamine (Lyso-PE)**

|    |       |              |   |                                                   |       |             |
|----|-------|--------------|---|---------------------------------------------------|-------|-------------|
| 1  | 12.01 | 16:1/Lyso-PE | 2 | C <sub>21</sub> H <sub>43</sub> NO <sub>7</sub> P | 452.3 | 141.0/311.3 |
| 2  | 14.69 | Lyso-PE/16:0 | 1 | C <sub>21</sub> H <sub>45</sub> NO <sub>7</sub> P | 454.3 | 141.0/313.3 |
| 3  | 16.14 | 16:0/Lyso-PE | 1 | C <sub>21</sub> H <sub>45</sub> NO <sub>7</sub> P | 454.3 | 141.0/313.3 |
| 4  | 19.00 | Lyso-PE/17:0 | 1 | C <sub>22</sub> H <sub>47</sub> NO <sub>7</sub> P | 468.3 | 141.0/327.3 |
| 5  | 21.29 | 17:0/Lyso-PE | 1 | C <sub>22</sub> H <sub>47</sub> NO <sub>7</sub> P | 468.3 | 141.0/327.3 |
| 6  | 12.81 | Lyso-PE/18:2 | 3 | C <sub>23</sub> H <sub>45</sub> NO <sub>7</sub> P | 478.3 | 141.0/337.3 |
| 7  | 13.73 | 18:2/Lyso-PE | 3 | C <sub>23</sub> H <sub>45</sub> NO <sub>7</sub> P | 478.3 | 141.0/337.3 |
| 8  | 16.90 | Lyso-PE/18:1 | 2 | C <sub>23</sub> H <sub>47</sub> NO <sub>7</sub> P | 480.3 | 141.0/339.3 |
| 9  | 18.61 | 18:1/Lyso-PE | 2 | C <sub>23</sub> H <sub>47</sub> NO <sub>7</sub> P | 480.3 | 141.0/339.3 |
| 10 | 25.90 | Lyso-PE/18:0 | 1 | C <sub>23</sub> H <sub>49</sub> NO <sub>7</sub> P | 482.3 | 141.0/341.3 |
| 11 | 29.42 | 18:0/Lyso-PE | 1 | C <sub>23</sub> H <sub>49</sub> NO <sub>7</sub> P | 482.3 | 141.0/341.3 |
| 12 | 13.01 | Lyso-PE/20:4 | 5 | C <sub>25</sub> H <sub>45</sub> NO <sub>7</sub> P | 502.3 | 141.0/361.3 |
| 13 | 13.84 | 20:4/Lyso-PE | 5 | C <sub>25</sub> H <sub>45</sub> NO <sub>7</sub> P | 502.3 | 141.0/361.3 |
| 14 | 15.10 | Lyso-PE/20:3 | 4 | C <sub>25</sub> H <sub>47</sub> NO <sub>7</sub> P | 504.3 | 141.0/363.3 |
| 15 | 16.39 | 20:3/Lyso-PE | 4 | C <sub>25</sub> H <sub>47</sub> NO <sub>7</sub> P | 504.3 | 141.0/363.3 |
| 16 | 13.07 | Lyso-PE/22:6 | 7 | C <sub>27</sub> H <sub>45</sub> NO <sub>7</sub> P | 526.3 | 141.0/385.3 |
| 17 | 13.77 | 22:6/Lyso-PE | 7 | C <sub>27</sub> H <sub>45</sub> NO <sub>7</sub> P | 526.3 | 141.0/385.3 |
| 18 | 14.39 | Lyso-PE/22:5 | 6 | C <sub>27</sub> H <sub>47</sub> NO <sub>7</sub> P | 528.3 | 141.0/387.3 |
| 19 | 15.45 | 22:5/Lyso-PE | 6 | C <sub>27</sub> H <sub>47</sub> NO <sub>7</sub> P | 528.3 | 141.0/387.3 |
| 20 | 16.39 | Lyso-PE/22:5 | 6 | C <sub>27</sub> H <sub>47</sub> NO <sub>7</sub> P | 528.3 | 141.0/387.3 |
| 21 | 17.65 | 22:5/Lyso-PE | 6 | C <sub>27</sub> H <sub>47</sub> NO <sub>7</sub> P | 528.3 | 141.0/387.3 |
| 22 | 18.70 | Lyso-PE/22:4 | 5 | C <sub>27</sub> H <sub>49</sub> NO <sub>7</sub> P | 530.3 | 141.0/389.3 |
| 23 | 20.45 | 22:4/Lyso-PE | 5 | C <sub>27</sub> H <sub>49</sub> NO <sub>7</sub> P | 530.3 | 141.0/389.3 |

#### **Lysophosphatidylserine (Lyso-PS)**

|   |       |              |   |                                                   |       |             |
|---|-------|--------------|---|---------------------------------------------------|-------|-------------|
| 1 | 12.03 | Lyso-PS/18:2 | 3 | C <sub>24</sub> H <sub>45</sub> NO <sub>9</sub> P | 522.3 | 105.0/337.3 |
| 2 | 12.96 | 18:2/Lyso-PS | 3 | C <sub>24</sub> H <sub>45</sub> NO <sub>9</sub> P | 522.3 | 105.0/337.3 |
| 3 | 22.95 | Lyso-PS/18:0 | 1 | C <sub>24</sub> H <sub>49</sub> NO <sub>9</sub> P | 526.3 | 105.0/341.3 |
| 4 | 26.8  | 18:0/Lyso-PS | 1 | C <sub>24</sub> H <sub>49</sub> NO <sub>9</sub> P | 526.3 | 105.0/341.3 |
| 5 | 13.22 | 20:4/Lyso-PS | 5 | C <sub>26</sub> H <sub>45</sub> NO <sub>9</sub> P | 546.3 | 105.0/361.3 |

---

**Table S1.2. The qualitative analysis of Lyso-PA, Lyso-PI and Lyso-PG in mice serum by negative LC-MS/MS.**

| No.                                        | RT (min) | Structures   | RDB | Formula                                           | Q1    | Q3          |
|--------------------------------------------|----------|--------------|-----|---------------------------------------------------|-------|-------------|
| <b>Lyso-phosphatidic acid (Lyso-PA)</b>    |          |              |     |                                                   |       |             |
| 1                                          | 14.12    | 16:1/Lyso-PA | 2   | C <sub>19</sub> H <sub>36</sub> O <sub>7</sub> P  | 407.2 | 153.0/171.0 |
| 2                                          | 18.44    | Lyso-PA/16:0 | 1   | C <sub>19</sub> H <sub>38</sub> O <sub>7</sub> P  | 409.2 | 153.0/171.0 |
| 3                                          | 20.31    | 16:0/Lyso-PA | 1   | C <sub>19</sub> H <sub>38</sub> O <sub>7</sub> P  | 409.2 | 153.0/171.0 |
| 4                                          | 15.42    | Lyso-PA/18:2 | 3   | C <sub>21</sub> H <sub>38</sub> O <sub>7</sub> P  | 433.2 | 153.0/171.0 |
| 5                                          | 16.6     | 18:2/Lyso-PA | 3   | C <sub>21</sub> H <sub>38</sub> O <sub>7</sub> P  | 433.2 | 153.0/171.0 |
| 6                                          | 21.77    | Lyso-PA/18:1 | 2   | C <sub>21</sub> H <sub>40</sub> O <sub>7</sub> P  | 435.2 | 153.0/171.0 |
| 7                                          | 24.01    | 18:1/Lyso-PA | 2   | C <sub>21</sub> H <sub>40</sub> O <sub>7</sub> P  | 435.2 | 153.0/171.0 |
| 8                                          | 32.83    | Lyso-PA/18:0 | 1   | C <sub>21</sub> H <sub>42</sub> O <sub>7</sub> P  | 437.2 | 153.0/171.0 |
| 9                                          | 34.56    | 18:0/Lyso-PA | 1   | C <sub>21</sub> H <sub>42</sub> O <sub>7</sub> P  | 437.2 | 153.0/171.0 |
| 10                                         | 15.71    | Lyso-PA/20:4 | 5   | C <sub>23</sub> H <sub>38</sub> O <sub>7</sub> P  | 457.2 | 153.0/171.0 |
| 11                                         | 16.74    | 20:4/Lyso-PA | 5   | C <sub>23</sub> H <sub>38</sub> O <sub>7</sub> P  | 457.2 | 153.0/171.0 |
| 12                                         | 18.85    | Lyso-PA/20:3 | 4   | C <sub>23</sub> H <sub>40</sub> O <sub>7</sub> P  | 459.2 | 153.0/171.0 |
| 13                                         | 20.47    | 20:3/Lyso-PA | 4   | C <sub>23</sub> H <sub>40</sub> O <sub>7</sub> P  | 459.2 | 153.0/171.0 |
| 14                                         | 15.62    | Lyso-PA/22:6 | 7   | C <sub>25</sub> H <sub>38</sub> O <sub>7</sub> P  | 481.2 | 153.0/171.0 |
| 15                                         | 16.52    | 22:6/Lyso-PA | 7   | C <sub>25</sub> H <sub>38</sub> O <sub>7</sub> P  | 481.2 | 153.0/171.0 |
| <b>Lyso-phosphatidylinositol (Lyso-PI)</b> |          |              |     |                                                   |       |             |
| 1                                          | 11.21    | 16:1/Lyso-PI | 2   | C <sub>25</sub> H <sub>46</sub> O <sub>12</sub> P | 569.3 | 253.2/389.2 |
| 2                                          | 13.18    | Lyso-PI/16:0 | 1   | C <sub>25</sub> H <sub>48</sub> O <sub>12</sub> P | 571.3 | 255.2/391.2 |
| 3                                          | 14.50    | 16:0/Lyso-PI | 1   | C <sub>25</sub> H <sub>48</sub> O <sub>12</sub> P | 571.3 | 255.2/391.2 |
| 4                                          | 11.81    | Lyso-PI/18:2 | 3   | C <sub>27</sub> H <sub>48</sub> O <sub>12</sub> P | 595.3 | 279.2/415.2 |
| 5                                          | 12.65    | 18:2/Lyso-PI | 3   | C <sub>27</sub> H <sub>48</sub> O <sub>12</sub> P | 595.3 | 279.2/415.2 |
| 6                                          | 14.97    | Lyso-PI/18:1 | 2   | C <sub>27</sub> H <sub>50</sub> O <sub>12</sub> P | 597.3 | 281.2/417.2 |
| 7                                          | 16.52    | 18:1/Lyso-PI | 2   | C <sub>27</sub> H <sub>50</sub> O <sub>12</sub> P | 597.3 | 281.1/417.2 |
| 8                                          | 21.88    | Lyso-PI/18:0 | 1   | C <sub>27</sub> H <sub>52</sub> O <sub>12</sub> P | 599.3 | 283.3/419.3 |
| 9                                          | 25.27    | 18:0/Lyso-PI | 1   | C <sub>27</sub> H <sub>52</sub> O <sub>12</sub> P | 599.3 | 283.3/419.3 |
| 10                                         | 12.05    | Lyso-PI/20:4 | 5   | C <sub>29</sub> H <sub>48</sub> O <sub>12</sub> P | 619.3 | 303.2/439.2 |
| 11                                         | 12.86    | 20:4/Lyso-PI | 5   | C <sub>29</sub> H <sub>48</sub> O <sub>12</sub> P | 619.3 | 303.2/439.2 |
| 12                                         | 13.75    | Lyso-PI/20:3 | 4   | C <sub>29</sub> H <sub>50</sub> O <sub>12</sub> P | 621.3 | 305.3/441.2 |
| 13                                         | 14.91    | 20:3/Lyso-PI | 4   | C <sub>29</sub> H <sub>50</sub> O <sub>12</sub> P | 621.3 | 305.3/441.2 |
| 14                                         | 12.07    | Lyso-PI/22:6 | 7   | C <sub>31</sub> H <sub>48</sub> O <sub>12</sub> P | 643.3 | 327.2/463.2 |
| 15                                         | 12.83    | 22:6/Lyso-PI | 7   | C <sub>31</sub> H <sub>48</sub> O <sub>12</sub> P | 643.3 | 327.2/463.2 |
| 16                                         | 14.13    | 22:5/Lyso-PI | 6   | C <sub>31</sub> H <sub>50</sub> O <sub>12</sub> P | 645.3 | 329.3/465.2 |
| 17                                         | 16.04    | Lyso-PI/22:5 | 6   | C <sub>31</sub> H <sub>50</sub> O <sub>12</sub> P | 645.3 | 329.3/465.2 |
| 18                                         | 16.52    | Lyso-PI/22:4 | 5   | C <sub>31</sub> H <sub>52</sub> O <sub>12</sub> P | 647.3 | 331.3/467.3 |
| 19                                         | 18.25    | 22:4/Lyso-PI | 5   | C <sub>31</sub> H <sub>52</sub> O <sub>12</sub> P | 647.3 | 331.3/467.3 |
| <b>Lyso-phosphatidylglycerol (Lyso-PG)</b> |          |              |     |                                                   |       |             |
| 1                                          | 14.03    | Lysp-PG/18:2 | 3   | C <sub>24</sub> H <sub>44</sub> O <sub>9</sub> P  | 507.3 | 227.0/279.2 |
| 2                                          | 15.24    | 18:2/Lyso-PG | 3   | C <sub>24</sub> H <sub>44</sub> O <sub>9</sub> P  | 507.3 | 227.0/279.2 |
| 3                                          | 18.93    | Lysp-PG/18:1 | 2   | C <sub>24</sub> H <sub>46</sub> O <sub>9</sub> P  | 509.3 | 227.0/281.3 |

|   |       |              |   |                                                  |       |             |
|---|-------|--------------|---|--------------------------------------------------|-------|-------------|
| 4 | 21.31 | 18:1/Lyso-PG | 2 | C <sub>24</sub> H <sub>46</sub> O <sub>9</sub> P | 509.3 | 227.0/281.3 |
| 5 | 29.97 | Lysp-PG/18:0 | 1 | C <sub>24</sub> H <sub>48</sub> O <sub>9</sub> P | 511.3 | 227.0/283.3 |
| 6 | 32.56 | 18:0/Lyso-PG | 1 | C <sub>24</sub> H <sub>48</sub> O <sub>9</sub> P | 511.3 | 227.0/283.3 |

---
