# Supplementary material for: The metabolic change in serum lysoglycerophospholipids intervened by triterpenoid saponins from Kuding tea on hyperlipidemic mice
Source: Royal Society of Chemistry journal article supplement (doi:10.1039/c9fo02142f), 2019-01-01
Supplement: c9fo02142f5.pdf [file c9fo02142f5.pdf]

**Table S2. The relative quantitative analysis of serum Lyso-GPLs in mice by LC-MS/MS.**

| No.                                         | RT (min) | Structures   | RDB | fatty acyl group                               | Formula                                           | Groups            |                   |                    |                    |                    |
|---------------------------------------------|----------|--------------|-----|------------------------------------------------|---------------------------------------------------|-------------------|-------------------|--------------------|--------------------|--------------------|
|                                             |          |              |     |                                                |                                                   | C                 | M                 | K <sub>L</sub>     | K <sub>M</sub>     | K <sub>H</sub>     |
| <b>Lyso-phosphatidylcholines (Lyso-PCs)</b> |          |              |     |                                                |                                                   |                   |                   |                    |                    |                    |
| 1                                           | 10.5     | Lyso-PC/14:0 | 1   | C <sub>14</sub> H <sub>28</sub> O <sub>2</sub> | C <sub>22</sub> H <sub>47</sub> NO <sub>7</sub> P | 0.1075±0.03272    | 0.08317±0.01532   | 0.1313±0.03785     | 0.1622±0.02426**   | 0.1805±0.04551**   |
| 2                                           | 11.1     | 14:0/Lyso-PC | 1   | C <sub>14</sub> H <sub>28</sub> O <sub>2</sub> | C <sub>22</sub> H <sub>47</sub> NO <sub>7</sub> P | 0.1158±0.02845    | 0.0905±0.02005    | 0.1527±0.04302*    | 0.1848±0.02428**   | 0.2415±0.05142**   |
| 3                                           | 11.8     | Lyso-PC/15:1 | 2   | C <sub>15</sub> H <sub>30</sub> O <sub>2</sub> | C <sub>23</sub> H <sub>49</sub> NO <sub>7</sub> P | 0.007092±0.004173 | 0.003213±0.001536 | 0.007357±0.002344  | 0.01048±0.003457** | 0.012±0.002806**   |
| 4                                           | 12.2     | Lyso-PC/15:1 | 2   | C <sub>15</sub> H <sub>30</sub> O <sub>2</sub> | C <sub>23</sub> H <sub>49</sub> NO <sub>7</sub> P | 0.3198±0.06433*   | 0.1875±0.04221    | 0.3557±0.06211**   | 0.456±0.1064**     | 0.4655±0.0598**    |
| 5                                           | 12.6     | 15:1/Lyso-PC | 2   | C <sub>15</sub> H <sub>30</sub> O <sub>2</sub> | C <sub>23</sub> H <sub>49</sub> NO <sub>7</sub> P | 0.02738*±0.0127   | 0.01221±0.005273  | 0.02045±0.008864   | 0.02802±0.008403*  | 0.03163±0.005375** |
| 6                                           | 13.1     | Lyso-PC/15:1 | 2   | C <sub>15</sub> H <sub>30</sub> O <sub>2</sub> | C <sub>23</sub> H <sub>49</sub> NO <sub>7</sub> P | 0.7817±0.1372     | 0.4938±0.09735    | 0.9983±0.2429**    | 1.26±0.3366**      | 1.315±0.1714**     |
| 7                                           | 11.5     | Lyso-PC/16:1 | 2   | C <sub>16</sub> H <sub>30</sub> O <sub>2</sub> | C <sub>24</sub> H <sub>49</sub> NO <sub>7</sub> P | 0.2817±0.03488    | 0.2367±0.0568     | 0.6683±0.2219**    | 0.8667±0.2202**    | 1.032±0.3639**     |
| 8                                           | 11.7     | Lyso-PC/16:1 | 2   | C <sub>16</sub> H <sub>30</sub> O <sub>2</sub> | C <sub>24</sub> H <sub>49</sub> NO <sub>7</sub> P | 0.1084±0.02589    | 0.09453±0.03833   | 0.3258±0.1055**    | 0.3305±0.07631**   | 0.387±0.1292**     |
| 9                                           | 12.2     | 16:1/Lyso-PC | 2   | C <sub>16</sub> H <sub>30</sub> O <sub>2</sub> | C <sub>24</sub> H <sub>49</sub> NO <sub>7</sub> P | 0.7467±0.1902     | 0.5587±0.1696     | 1.603±0.4747**     | 2.097±0.5316**     | 2.213±0.4217**     |
| 10                                          | 12.4     | 16:1/Lyso-PC | 2   | C <sub>16</sub> H <sub>30</sub> O <sub>2</sub> | C <sub>24</sub> H <sub>49</sub> NO <sub>7</sub> P | 0.2333±0.05989    | 0.2283±0.08612    | 0.655±0.1429**     | 0.7567±0.2528**    | 0.8817±0.2748**    |
| 11                                          | 14.9     | Lyso-PC/16:0 | 1   | C <sub>16</sub> H <sub>32</sub> O <sub>2</sub> | C <sub>24</sub> H <sub>51</sub> NO <sub>7</sub> P | 2.265±0.3924      | 2.148±0.2839      | 2.26±0.2531        | 2.358±0.5116       | 2.387±0.5466       |
| 12                                          | 16.5     | 16:0/Lyso-PC | 1   | C <sub>16</sub> H <sub>32</sub> O <sub>2</sub> | C <sub>24</sub> H <sub>51</sub> NO <sub>7</sub> P | 1.49±0.2314       | 1.502±0.1393      | 1.54±0.1073        | 1.585±0.2786       | 1.905±0.3717*      |
| 13                                          | 13.7     | Lyso-PC/17:1 | 2   | C <sub>17</sub> H <sub>32</sub> O <sub>2</sub> | C <sub>25</sub> H <sub>51</sub> NO <sub>7</sub> P | 0.05667±0.02094   | 0.1085±0.03202    | 0.1663±0.07726     | 0.2032±0.05978*    | 0.2318±0.04841**   |
| 14                                          | 14.8     | 17:1/Lyso-PC | 2   | C <sub>17</sub> H <sub>32</sub> O <sub>2</sub> | C <sub>25</sub> H <sub>51</sub> NO <sub>7</sub> P | 0.1508±0.04492    | 0.2282±0.09144    | 0.4592±0.1316**    | 0.5223±0.1004**    | 0.538±0.1212**     |
| 15                                          | 18.3     | Lyso-PC/17:0 | 1   | C <sub>17</sub> H <sub>34</sub> O <sub>2</sub> | C <sub>25</sub> H <sub>53</sub> NO <sub>7</sub> P | 0.1902±0.0297     | 0.144±0.03896     | 0.41±0.1972**      | 0.5033±0.1342**    | 0.6325±0.05205**   |
| 16                                          | 19.4     | 17:0/Lyso-PC | 1   | C <sub>17</sub> H <sub>34</sub> O <sub>2</sub> | C <sub>25</sub> H <sub>53</sub> NO <sub>7</sub> P | 1.17±0.153        | 1.032±0.1264      | 1.448±0.2957*      | 1.455±0.3883*      | 1.73±0.2146**      |
| 17                                          | 20.4     | 17:0/Lyso-PC | 1   | C <sub>17</sub> H <sub>34</sub> O <sub>2</sub> | C <sub>25</sub> H <sub>53</sub> NO <sub>7</sub> P | 0.2628±0.05841    | 0.1725±0.05435    | 0.5145±0.2565**    | 0.5787±0.1755**    | 0.8082±0.06998**   |
| 18                                          | 21.8     | 17:0/Lyso-PC | 1   | C <sub>17</sub> H <sub>34</sub> O <sub>2</sub> | C <sub>25</sub> H <sub>53</sub> NO <sub>7</sub> P | 1.542±0.2127      | 1.258±0.2572      | 1.847±0.3546*      | 1.942±0.492*       | 2.053±0.4362**     |
| 19                                          | 10.9     | Lyso-PC/18:3 | 4   | C <sub>18</sub> H <sub>30</sub> O <sub>2</sub> | C <sub>26</sub> H <sub>49</sub> NO <sub>7</sub> P | 0.0207±0.008672   | 0.01742±0.003093  | 0.03822±0.007791** | 0.04002±0.01249**  | 0.05327±0.0155**   |
| 20                                          | 11.2     | Lyso-PC/18:3 | 4   | C <sub>18</sub> H <sub>30</sub> O <sub>2</sub> | C <sub>26</sub> H <sub>49</sub> NO <sub>7</sub> P | 0.05867±0.01925   | 0.05667±0.004885  | 0.1108±0.01594**   | 0.1502±0.03354**   | 0.107±0.01638**    |
| 21                                          | 11.5     | 18:3/Lyso-PC | 4   | C <sub>18</sub> H <sub>30</sub> O <sub>2</sub> | C <sub>26</sub> H <sub>49</sub> NO <sub>7</sub> P | 0.05468±0.02429   | 0.04947±0.0058    | 0.09612±0.03466*   | 0.1038±0.02352**   | 0.1295±0.03008**   |

|    |      |              |   |                                                |                                                   |                   |                  |                    |                    |                    |
|----|------|--------------|---|------------------------------------------------|---------------------------------------------------|-------------------|------------------|--------------------|--------------------|--------------------|
| 22 | 11.8 | 18:3/Lyso-PC | 4 | C <sub>18</sub> H <sub>30</sub> O <sub>2</sub> | C <sub>26</sub> H <sub>49</sub> NO <sub>7</sub> P | 0.1427±0.04655    | 0.1537±0.02314   | 0.264±0.04056**    | 0.2727±0.03867**   | 0.3172±0.08234**   |
| 23 | 13.0 | Lyso-PC/18:2 | 3 | C <sub>18</sub> H <sub>32</sub> O <sub>2</sub> | C <sub>26</sub> H <sub>51</sub> NO <sub>7</sub> P | 0.5402±0.1342     | 0.6722±0.1038    | 1.015±0.1959*      | 1.025±0.1796**     | 1.21±0.2662**      |
| 24 | 13.9 | 18:2/Lyso-PC | 3 | C <sub>18</sub> H <sub>32</sub> O <sub>2</sub> | C <sub>26</sub> H <sub>51</sub> NO <sub>7</sub> P | 0.4567±0.07879    | 0.5612±0.07969   | 0.7618±0.1515*     | 0.7613±0.09328*    | 0.8773±0.1866**    |
| 25 | 16.9 | Lyso-PC/18:1 | 2 | C <sub>18</sub> H <sub>34</sub> O <sub>2</sub> | C <sub>26</sub> H <sub>53</sub> NO <sub>7</sub> P | 0.06017±0.01583   | 0.087±0.0284     | 0.1307±0.02372     | 0.149±0.0607*      | 0.1698±0.04401**   |
| 26 | 17.2 | Lyso-PC/18:1 | 2 | C <sub>18</sub> H <sub>34</sub> O <sub>2</sub> | C <sub>26</sub> H <sub>53</sub> NO <sub>7</sub> P | 0.3153±0.1315**   | 0.6125±0.1856    | 0.6757±0.1289      | 0.7058±0.1503      | 0.719±0.1434       |
| 27 | 18.6 | 18:1/Lyso-PC | 2 | C <sub>18</sub> H <sub>34</sub> O <sub>2</sub> | C <sub>26</sub> H <sub>53</sub> NO <sub>7</sub> P | 0.04752±0.009574  | 0.06985±0.02126  | 0.08745±0.03318    | 0.1011±0.02128     | 0.1302±0.03441**   |
| 28 | 18.9 | 18:1/Lyso-PC | 2 | C <sub>18</sub> H <sub>34</sub> O <sub>2</sub> | C <sub>26</sub> H <sub>53</sub> NO <sub>7</sub> P | 0.2848±0.1001**   | 0.5268±0.1592    | 0.6048±0.09999     | 0.6212±0.1122      | 0.6982±0.1339      |
| 29 | 26.6 | Lyso-PC/18:0 | 1 | C <sub>18</sub> H <sub>36</sub> O <sub>2</sub> | C <sub>26</sub> H <sub>55</sub> NO <sub>7</sub> P | 1.883±0.2786**    | 2.817±0.2885     | 2.237±0.5652       | 2.222±0.5406       | 2.13±0.4437*       |
| 30 | 30.0 | 18:0/Lyso-PC | 1 | C <sub>18</sub> H <sub>36</sub> O <sub>2</sub> | C <sub>26</sub> H <sub>55</sub> NO <sub>7</sub> P | 1.149±0.1621      | 1.433±0.1601     | 1.5±0.2684         | 1.353±0.26         | 1.333±0.1699       |
| 31 | 15.8 | Lyso-PC/19:2 | 3 | C <sub>19</sub> H <sub>34</sub> O <sub>2</sub> | C <sub>27</sub> H <sub>53</sub> NO <sub>7</sub> P | 0.01812±0.005614  | 0.01038±0.001327 | 0.02287±0.005077** | 0.02853±0.009988** | 0.03252±0.005289** |
| 32 | 17.3 | 19:2/Lyso-PC | 3 | C <sub>19</sub> H <sub>34</sub> O <sub>2</sub> | C <sub>27</sub> H <sub>53</sub> NO <sub>7</sub> P | 0.03553±0.01389   | 0.02757±0.005874 | 0.07318±0.02566**  | 0.07478±0.02756**  | 0.08413±0.01857**  |
| 33 | 20.8 | 19:2/Lyso-PC | 3 | C <sub>19</sub> H <sub>34</sub> O <sub>2</sub> | C <sub>27</sub> H <sub>53</sub> NO <sub>7</sub> P | 0.01568±0.00347** | 0.007442±0.003   | 0.01208±0.003419   | 0.01337±0.002855*  | 0.01465±0.004153** |
| 34 | 22.2 | Lyso-PC/19:1 | 2 | C <sub>19</sub> H <sub>36</sub> O <sub>2</sub> | C <sub>27</sub> H <sub>55</sub> NO <sub>7</sub> P | 0.02788±0.005067  | 0.04177±0.01009  | 0.0913±0.0446*     | 0.09153±0.02945*   | 0.1292±0.02292**   |
| 35 | 22.9 | Lyso-PC/19:1 | 2 | C <sub>19</sub> H <sub>36</sub> O <sub>2</sub> | C <sub>27</sub> H <sub>55</sub> NO <sub>7</sub> P | 0.01595±0.002159  | 0.0184±0.00757   | 0.05195±0.01719**  | 0.05878±0.01597**  | 0.06115±0.01435**  |
| 36 | 24.9 | 19:1/Lyso-PC | 2 | C <sub>19</sub> H <sub>36</sub> O <sub>2</sub> | C <sub>27</sub> H <sub>55</sub> NO <sub>7</sub> P | 0.06433±0.01461   | 0.1037±0.02646   | 0.228±0.1063*      | 0.2505±0.06201**   | 0.296±0.07552**    |
| 37 | 25.7 | 19:1/Lyso-PC | 2 | C <sub>19</sub> H <sub>36</sub> O <sub>2</sub> | C <sub>27</sub> H <sub>55</sub> NO <sub>7</sub> P | 0.04±0.005727     | 0.05383±0.01572  | 0.1417±0.02619**   | 0.1562±0.03893**   | 0.16±0.0411**      |
| 38 | 32.3 | Lyso-PC/19:0 | 1 | C <sub>19</sub> H <sub>38</sub> O <sub>2</sub> | C <sub>27</sub> H <sub>57</sub> NO <sub>7</sub> P | 0.0425±0.02182    | 0.04033±0.02051  | 0.2533±0.06341**   | 0.27±0.0906**      | 0.2928±0.05986**   |
| 39 | 33.4 | Lyso-PC/19:0 | 1 | C <sub>19</sub> H <sub>38</sub> O <sub>2</sub> | C <sub>27</sub> H <sub>57</sub> NO <sub>7</sub> P | 0.9233±0.4237     | 0.9333±0.2873    | 2.203±0.6648**     | 2.338±0.6382**     | 2.687±0.4279**     |
| 40 | 34.1 | 19:0/Lyso-PC | 1 | C <sub>19</sub> H <sub>38</sub> O <sub>2</sub> | C <sub>27</sub> H <sub>57</sub> NO <sub>7</sub> P | 0.425±0.07791**   | 0.075±0.03463    | 0.5282±0.2255**    | 0.5252±0.1423**    | 0.585±0.1583**     |
| 41 | 35.1 | 19:0/Lyso-PC | 1 | C <sub>19</sub> H <sub>38</sub> O <sub>2</sub> | C <sub>27</sub> H <sub>57</sub> NO <sub>7</sub> P | 2.098±0.9168      | 1.98±0.6832      | 3.02±0.9133        | 3.042±0.8194       | 3.327±1.026*       |
| 42 | 11.1 | Lyso-PC/20:5 | 6 | C <sub>20</sub> H <sub>30</sub> O <sub>2</sub> | C <sub>28</sub> H <sub>49</sub> NO <sub>7</sub> P | 0.2672±0.0618*    | 0.05867±0.02525  | 0.405±0.1769**     | 0.5292±0.09725**   | 0.6208±0.1652**    |
| 43 | 11.6 | 20:5/Lyso-PC | 6 | C <sub>20</sub> H <sub>30</sub> O <sub>2</sub> | C <sub>28</sub> H <sub>49</sub> NO <sub>7</sub> P | 0.4942±0.1026*    | 0.1398±0.04754   | 0.8493±0.2966**    | 1.079±0.2194**     | 1.547±0.3014**     |
| 44 | 13.2 | Lyso-PC/20:4 | 5 | C <sub>20</sub> H <sub>32</sub> O <sub>2</sub> | C <sub>28</sub> H <sub>51</sub> NO <sub>7</sub> P | 0.7857±0.1988     | 0.7255±0.1691    | 1.148±0.3724*      | 1.286±0.3206**     | 1.377±0.1931**     |
| 45 | 14.0 | 20:4/Lyso-PC | 5 | C <sub>20</sub> H <sub>32</sub> O <sub>2</sub> | C <sub>28</sub> H <sub>51</sub> NO <sub>7</sub> P | 0.3527±0.1431     | 0.5193±0.1668    | 0.6752±0.207       | 0.7257±0.1389      | 0.8187±0.106**     |
| 46 | 15.3 | Lyso-PC/20:3 | 4 | C <sub>20</sub> H <sub>34</sub> O <sub>2</sub> | C <sub>28</sub> H <sub>53</sub> NO <sub>7</sub> P | 0.4682±0.1044     | 0.7025±0.2627    | 1.592±0.3085**     | 1.625±0.3279**     | 1.81±0.4476**      |

|    |      |              |   |                                                |                                                   |                    |                   |                     |                    |                     |
|----|------|--------------|---|------------------------------------------------|---------------------------------------------------|--------------------|-------------------|---------------------|--------------------|---------------------|
| 47 | 15.9 | Lyso-PC/20:3 | 4 | C <sub>20</sub> H <sub>34</sub> O <sub>2</sub> | C <sub>28</sub> H <sub>53</sub> NO <sub>7</sub> P | 0.03625±0.01825    | 0.05315±0.01215   | 0.03857±0.01808     | 0.04267±0.008628   | 0.06747±0.01925     |
| 48 | 16.7 | 20:3/Lyso-PC | 4 | C <sub>20</sub> H <sub>34</sub> O <sub>2</sub> | C <sub>28</sub> H <sub>53</sub> NO <sub>7</sub> P | 0.4883±0.1634      | 0.5235±0.2232     | 1.132±0.1543**      | 1.233±0.3122**     | 1.288±0.3152**      |
| 49 | 17.3 | 20:3/Lyso-PC | 4 | C <sub>20</sub> H <sub>34</sub> O <sub>2</sub> | C <sub>28</sub> H <sub>53</sub> NO <sub>7</sub> P | 0.02502±0.008983   | 0.05968±0.025     | 0.04567±0.007118    | 0.05875±0.02016    | 0.06113±0.03899     |
| 50 | 18.8 | 20:3/Lyso-PC | 4 | C <sub>20</sub> H <sub>34</sub> O <sub>2</sub> | C <sub>28</sub> H <sub>53</sub> NO <sub>7</sub> P | 0.008017±0.002108  | 0.01608±0.003831  | 0.01643±0.002204    | 0.02128±0.008108   | 0.02275±0.007783    |
| 51 | 20.2 | Lyso-PC/20:2 | 3 | C <sub>20</sub> H <sub>36</sub> O <sub>2</sub> | C <sub>28</sub> H <sub>55</sub> NO <sub>7</sub> P | 0.4432±0.106       | 0.7853±0.2346     | 0.9448±0.2403       | 1.013±0.3199       | 1.117±0.2059        |
| 52 | 21.4 | Lyso-PC/20:2 | 3 | C <sub>20</sub> H <sub>36</sub> O <sub>2</sub> | C <sub>28</sub> H <sub>55</sub> NO <sub>7</sub> P | 0.007567±0.001296  | 0.00805±0.0009894 | 0.02897±0.006467**  | 0.03495±0.006503** | 0.03095±0.009915**  |
| 53 | 22.5 | 20:2/Lyso-PC | 3 | C <sub>20</sub> H <sub>36</sub> O <sub>2</sub> | C <sub>28</sub> H <sub>55</sub> NO <sub>7</sub> P | 1.1±0.4531         | 1.373±0.1679      | 1.928±0.435         | 2.125±0.6997*      | 2.132±0.3483*       |
| 54 | 23.7 | 20:2/Lyso-PC | 3 | C <sub>20</sub> H <sub>36</sub> O <sub>2</sub> | C <sub>28</sub> H <sub>55</sub> NO <sub>7</sub> P | 0.01798±0.005663   | 0.02408±0.01106   | 0.06108±0.009423**  | 0.06677±0.02365**  | 0.06918±0.01667**   |
| 55 | 30.1 | Lyso-PC/20:1 | 2 | C <sub>20</sub> H <sub>38</sub> O <sub>2</sub> | C <sub>28</sub> H <sub>57</sub> NO <sub>7</sub> P | 0.3693±0.2011      | 0.4285±0.1496     | 1.291±0.4007**      | 1.417±0.2443**     | 1.46±0.2247**       |
| 56 | 32.3 | 20:1/Lyso-PC | 2 | C <sub>20</sub> H <sub>38</sub> O <sub>2</sub> | C <sub>28</sub> H <sub>57</sub> NO <sub>7</sub> P | 0.4135±0.2466      | 0.5115±0.182      | 1.485±0.2739**      | 1.527±0.2744**     | 1.533±0.3502**      |
| 57 | 36.6 | Lyso-PC/20:0 | 1 | C <sub>20</sub> H <sub>40</sub> O <sub>2</sub> | C <sub>28</sub> H <sub>59</sub> NO <sub>7</sub> P | 0.04398±0.01586    | 0.03067±0.01506   | 0.1867±0.03395**    | 0.2175±0.06208**   | 0.2497±0.06157**    |
| 58 | 37.4 | Lyso-PC/20:0 | 1 | C <sub>20</sub> H <sub>40</sub> O <sub>2</sub> | C <sub>28</sub> H <sub>59</sub> NO <sub>7</sub> P | 0.5068±0.2503      | 0.5597±0.2495     | 1.644±0.5057**      | 2.048±0.5145**     | 2.163±0.4291**      |
| 59 | 38.0 | 20:0/Lyso-PC | 1 | C <sub>20</sub> H <sub>40</sub> O <sub>2</sub> | C <sub>28</sub> H <sub>59</sub> NO <sub>7</sub> P | 0.05783±0.02865    | 0.03787±0.01591   | 0.4357±0.197**      | 0.4718±0.1107**    | 0.5738±0.1475**     |
| 60 | 38.7 | 20:0/Lyso-PC | 1 | C <sub>20</sub> H <sub>40</sub> O <sub>2</sub> | C <sub>28</sub> H <sub>59</sub> NO <sub>7</sub> P | 1.865±0.4918       | 1.597±0.3087      | 3.248±0.9986**      | 4.035±0.8399**     | 4.053±0.9584**      |
| 61 | 11.5 | Lyso-PC/22:7 | 8 | C <sub>22</sub> H <sub>30</sub> O <sub>2</sub> | C <sub>30</sub> H <sub>49</sub> NO <sub>7</sub> P | 0.05178±0.01517**  | 0.02225±0.007266  | 0.04185±0.01635*    | 0.04422±0.01214*   | 0.0583±0.009639**   |
| 62 | 12.0 | 22:7/Lyso-PC | 8 | C <sub>22</sub> H <sub>30</sub> O <sub>2</sub> | C <sub>30</sub> H <sub>49</sub> NO <sub>7</sub> P | 0.07972±0.01564*   | 0.04222±0.01429   | 0.08395±0.03082*    | 0.08703±0.02319**  | 0.1191±0.02331**    |
| 63 | 12.8 | Lyso-PC/22:7 | 8 | C <sub>22</sub> H <sub>30</sub> O <sub>2</sub> | C <sub>30</sub> H <sub>49</sub> NO <sub>7</sub> P | 0.009048±0.00442** | 0.002558±0.001002 | 0.007648±0.001843** | 0.008197±0.00196** | 0.008915±0.001303** |
| 64 | 13.6 | 22:7/Lyso-PC | 8 | C <sub>22</sub> H <sub>30</sub> O <sub>2</sub> | C <sub>30</sub> H <sub>49</sub> NO <sub>7</sub> P | 0.02005±0.006779** | 0.005267±0.001911 | 0.01632±0.00153**   | 0.01925±0.00385**  | 0.02007±0.002497**  |
| 65 | 13.2 | Lyso-PC/22:6 | 7 | C <sub>22</sub> H <sub>32</sub> O <sub>2</sub> | C <sub>30</sub> H <sub>51</sub> NO <sub>7</sub> P | 0.02215±0.005748** | 0.00525±0.001803  | 0.01547±0.001622**  | 0.01965±0.004325** | 0.02135±0.001946**  |
| 66 | 14.0 | 22:6/Lyso-PC | 7 | C <sub>22</sub> H <sub>32</sub> O <sub>2</sub> | C <sub>30</sub> H <sub>51</sub> NO <sub>7</sub> P | 0.5602±0.1814**    | 0.2833±0.06091    | 0.371±0.09064       | 0.3877±0.08432     | 0.4783±0.1218*      |
| 67 | 14.6 | Lyso-PC/22:5 | 6 | C <sub>22</sub> H <sub>34</sub> O <sub>2</sub> | C <sub>30</sub> H <sub>53</sub> NO <sub>7</sub> P | 0.3333±0.1306**    | 0.156±0.05828     | 0.2762±0.0699       | 0.2818±0.06247*    | 0.2938±0.06678*     |
| 68 | 15.7 | 22:5/Lyso-PC | 6 | C <sub>22</sub> H <sub>34</sub> O <sub>2</sub> | C <sub>30</sub> H <sub>53</sub> NO <sub>7</sub> P | 0.4662±0.1849**    | 0.2177±0.08829    | 0.4297±0.1027*      | 0.4475±0.09468*    | 0.4892±0.1149**     |
| 69 | 16.7 | Lyso-PC/22:5 | 6 | C <sub>22</sub> H <sub>34</sub> O <sub>2</sub> | C <sub>30</sub> H <sub>53</sub> NO <sub>7</sub> P | 0.3285±0.0975*     | 0.1505±0.01864    | 0.243±0.07213       | 0.2817±0.1758      | 0.3088±0.08497*     |
| 70 | 18.0 | 22:5/Lyso-PC | 6 | C <sub>22</sub> H <sub>34</sub> O <sub>2</sub> | C <sub>30</sub> H <sub>53</sub> NO <sub>7</sub> P | 0.5153±0.2063*     | 0.241±0.04809     | 0.3643±0.1217       | 0.4278±0.2547      | 0.5213±0.1043*      |
| 71 | 19.1 | Lyso-PC/22:4 | 5 | C <sub>22</sub> H <sub>36</sub> O <sub>2</sub> | C <sub>30</sub> H <sub>55</sub> NO <sub>7</sub> P | 0.1847*±0.03407    | 0.1205±0.02771    | 0.1445±0.02837      | 0.197*±0.05756     | 0.1992±0.05212*     |

|    |      |              |   |                                                |                                                   |                   |                    |                    |                    |                    |
|----|------|--------------|---|------------------------------------------------|---------------------------------------------------|-------------------|--------------------|--------------------|--------------------|--------------------|
| 72 | 20.9 | 22:4/Lyso-PC | 5 | C <sub>22</sub> H <sub>36</sub> O <sub>2</sub> | C <sub>30</sub> H <sub>55</sub> NO <sub>7</sub> P | 0.1889±0.09697    | 0.1338±0.01734     | 0.1955±0.04971     | 0.2285±0.08911     | 0.2408±0.04267*    |
| 73 | 25.0 | Lyso-PC/22:3 | 4 | C <sub>22</sub> H <sub>38</sub> O <sub>2</sub> | C <sub>30</sub> H <sub>57</sub> NO <sub>7</sub> P | 0.004583±0.001182 | 0.004067±0.0007866 | 0.01002±0.001852** | 0.01185±0.003051** | 0.01295±0.002959** |
| 74 | 28.0 | 22:3/Lyso-PC | 4 | C <sub>22</sub> H <sub>38</sub> O <sub>2</sub> | C <sub>30</sub> H <sub>57</sub> NO <sub>7</sub> P | 0.02068±0.006554  | 0.01338±0.002881   | 0.02147±0.004299*  | 0.02268±0.005237*  | 0.02722±0.006395** |
| 75 | 33.3 | Lyso-PC/22:2 | 3 | C <sub>22</sub> H <sub>40</sub> O <sub>2</sub> | C <sub>30</sub> H <sub>59</sub> NO <sub>7</sub> P | 0.0198±0.006062*  | 0.01167±0.001369   | 0.01805±0.004493   | 0.01923±0.003747*  | 0.02327±0.006892** |
| 76 | 34.8 | 22:2/Lyso-PC | 3 | C <sub>22</sub> H <sub>40</sub> O <sub>2</sub> | C <sub>30</sub> H <sub>59</sub> NO <sub>7</sub> P | 0.0304±0.01073*   | 0.01662±0.003298   | 0.03247±0.007647*  | 0.0387±0.007497**  | 0.04258±0.01256**  |
| 77 | 38.3 | Lyso-PC/22:1 | 2 | C <sub>22</sub> H <sub>42</sub> O <sub>2</sub> | C <sub>30</sub> H <sub>61</sub> NO <sub>7</sub> P | 0.1522±0.03317    | 0.1028±0.01797     | 0.213±0.05059**    | 0.237±0.05123**    | 0.2697±0.05309**   |
| 78 | 39.2 | 22:1/Lyso-PC | 2 | C <sub>22</sub> H <sub>42</sub> O <sub>2</sub> | C <sub>30</sub> H <sub>61</sub> NO <sub>7</sub> P | 0.1723±0.1003     | 0.1418±0.04816     | 0.2882±0.07083*    | 0.328±0.08521**    | 0.371±0.0865**     |
| 79 | 18.0 | Lyso-PC/24:6 | 7 | C <sub>24</sub> H <sub>36</sub> O <sub>2</sub> | C <sub>32</sub> H <sub>55</sub> NO <sub>7</sub> P | 0.02352±0.00574*  | 0.01575±0.004224   | 0.02403±0.003694*  | 0.0265±0.005394**  | 0.03048±0.004743** |
| 80 | 18.7 | 24:6/Lyso-PC | 7 | C <sub>24</sub> H <sub>36</sub> O <sub>2</sub> | C <sub>32</sub> H <sub>55</sub> NO <sub>7</sub> P | 0.0271±0.01157    | 0.01833±0.003284   | 0.04532±0.005361** | 0.0502±0.01076**   | 0.05668±0.007536** |
| 81 | 22.5 | Lyso-PC/24:5 | 6 | C <sub>24</sub> H <sub>38</sub> O <sub>2</sub> | C <sub>32</sub> H <sub>57</sub> NO <sub>7</sub> P | 0.007733±0.003188 | 0.004467±0.001473  | 0.01305±0.002788** | 0.01327±0.001816** | 0.01565±0.003007** |
| 82 | 24.9 | 24:5/Lyso-PC | 6 | C <sub>24</sub> H <sub>38</sub> O <sub>2</sub> | C <sub>32</sub> H <sub>57</sub> NO <sub>7</sub> P | 0.01557±0.007409  | 0.01317±0.002591   | 0.02477±0.002282** | 0.02515±0.006026** | 0.02948±0.005743** |
| 83 | 27.3 | 24:5/Lyso-PC | 6 | C <sub>24</sub> H <sub>38</sub> O <sub>2</sub> | C <sub>32</sub> H <sub>57</sub> NO <sub>7</sub> P | 0.007107±0.00164* | 0.004877±0.001423  | 0.005327±0.0009923 | 0.00551±0.001189   | 0.005835±0.0007494 |
| 84 | 30.9 | Lyso-PC/24:4 | 5 | C <sub>24</sub> H <sub>40</sub> O <sub>2</sub> | C <sub>32</sub> H <sub>59</sub> NO <sub>7</sub> P | 0.01338±0.001698  | 0.013±0.001984     | 0.01158±0.001439   | 0.01325±0.002212   | 0.01367±0.001733   |
| 85 | 32.7 | 24:4/Lyso-PC | 5 | C <sub>24</sub> H <sub>40</sub> O <sub>2</sub> | C <sub>32</sub> H <sub>59</sub> NO <sub>7</sub> P | 0.01712±0.002801  | 0.01827±0.003909   | 0.01767±0.002537   | 0.01837±0.003292   | 0.01933±0.003912   |

### Lyso-phosphatidylethanolamines (Lyso-PEs)

|    |      |              |   |                                                |                                                   |                  |                   |                    |                   |                   |
|----|------|--------------|---|------------------------------------------------|---------------------------------------------------|------------------|-------------------|--------------------|-------------------|-------------------|
| 1  | 12.0 | 16:1/Lyso-PE | 2 | C <sub>16</sub> H <sub>30</sub> O <sub>2</sub> | C <sub>21</sub> H <sub>43</sub> NO <sub>7</sub> P | 0.0182±0.003543* | 0.007183±0.001635 | 0.02737±0.008924** | 0.02817±0.00621** | 0.0287±0.009953** |
| 2  | 14.7 | Lyso-PE/16:0 | 1 | C <sub>16</sub> H <sub>32</sub> O <sub>2</sub> | C <sub>21</sub> H <sub>45</sub> NO <sub>7</sub> P | 0.2864±0.04321   | 0.213±0.03166     | 0.3781±0.09487*    | 0.4166±0.1088**   | 0.4339±0.129**    |
| 3  | 16.1 | 16:0/Lyso-PE | 1 | C <sub>16</sub> H <sub>32</sub> O <sub>2</sub> | C <sub>21</sub> H <sub>45</sub> NO <sub>7</sub> P | 2.047±0.356      | 1.568±0.467       | 2.558±0.6623*      | 2.655±0.719*      | 2.977±0.8947**    |
| 4  | 19.0 | Lyso-PE/17:0 | 1 | C <sub>17</sub> H <sub>34</sub> O <sub>2</sub> | C <sub>22</sub> H <sub>47</sub> NO <sub>7</sub> P | 0.01391±0.004293 | 0.009932±0.003022 | 0.02965±0.008582** | 0.03111±0.01218** | 0.03481±0.01152** |
| 5  | 21.3 | 17:0/Lyso-PE | 1 | C <sub>17</sub> H <sub>34</sub> O <sub>2</sub> | C <sub>22</sub> H <sub>47</sub> NO <sub>7</sub> P | 0.06227±0.01738* | 0.03185±0.009397  | 0.08596±0.0182**   | 0.08548±0.02394** | 0.08724±0.02073** |
| 6  | 12.8 | Lyso-PE/18:2 | 3 | C <sub>18</sub> H <sub>32</sub> O <sub>2</sub> | C <sub>23</sub> H <sub>45</sub> NO <sub>7</sub> P | 0.3678±0.06481   | 0.1394±0.03776    | 0.5073±0.208*      | 0.6221±0.2706**   | 0.6552±0.2886**   |
| 7  | 13.7 | 18:2/Lyso-PE | 3 | C <sub>18</sub> H <sub>32</sub> O <sub>2</sub> | C <sub>23</sub> H <sub>45</sub> NO <sub>7</sub> P | 1.292±0.3799     | 0.6453±0.383      | 2.341±1.016*       | 3.472±1.434**     | 3.8±1.467**       |
| 8  | 16.9 | Lyso-PE/18:1 | 2 | C <sub>18</sub> H <sub>34</sub> O <sub>2</sub> | C <sub>23</sub> H <sub>47</sub> NO <sub>7</sub> P | 0.163±0.03634    | 0.1927±0.05493    | 0.5764±0.2384**    | 0.5941±0.2585**   | 0.6179±0.2665**   |
| 9  | 18.6 | 18:1/Lyso-PE | 2 | C <sub>18</sub> H <sub>34</sub> O <sub>2</sub> | C <sub>23</sub> H <sub>47</sub> NO <sub>7</sub> P | 0.4653±0.136     | 0.5254±0.1729     | 1.765±0.5582**     | 1.815±0.7619**    | 1.881±0.5157**    |
| 10 | 25.9 | Lyso-PE/18:0 | 1 | C <sub>18</sub> H <sub>36</sub> O <sub>2</sub> | C <sub>23</sub> H <sub>49</sub> NO <sub>7</sub> P | 0.7528±0.193     | 0.559±0.09649     | 0.8605±0.2179      | 0.8763±0.2835*    | 0.9095±0.2159*    |

|    |      |              |   |                                                |                                                   |                    |                     |                     |                     |                     |
|----|------|--------------|---|------------------------------------------------|---------------------------------------------------|--------------------|---------------------|---------------------|---------------------|---------------------|
| 11 | 29.4 | 18:0/Lyso-PE | 1 | C <sub>18</sub> H <sub>36</sub> O <sub>2</sub> | C <sub>23</sub> H <sub>49</sub> NO <sub>7</sub> P | 4.375±0.7611       | 3.253±0.5657        | 4.383±0.9068        | 4.879±1.221*        | 4.949±1.61*         |
| 12 | 13.0 | Lyso-PE/20:4 | 5 | C <sub>20</sub> H <sub>32</sub> O <sub>2</sub> | C <sub>25</sub> H <sub>45</sub> NO <sub>7</sub> P | 0.07712±0.01432    | 0.05168±0.01348     | 0.2978±0.116**      | 0.3301±0.1264**     | 0.3479±0.127**      |
| 13 | 13.8 | 20:4/Lyso-PE | 5 | C <sub>20</sub> H <sub>32</sub> O <sub>2</sub> | C <sub>25</sub> H <sub>45</sub> NO <sub>7</sub> P | 0.7043±0.1854      | 0.4373±0.104        | 2.615±0.5613**      | 2.827±0.5693**      | 3.609±0.4593**      |
| 14 | 15.1 | Lyso-PE/20:3 | 4 | C <sub>20</sub> H <sub>34</sub> O <sub>2</sub> | C <sub>25</sub> H <sub>47</sub> NO <sub>7</sub> P | 0.01119±0.005224   | 0.004558±0.001791   | 0.05468±0.02686*    | 0.08248±0.04175**   | 0.09267±0.04815**   |
| 15 | 16.4 | 20:3/Lyso-PE | 4 | C <sub>20</sub> H <sub>34</sub> O <sub>2</sub> | C <sub>25</sub> H <sub>47</sub> NO <sub>7</sub> P | 0.2315±0.06388     | 0.1355±0.0445       | 1.202±0.3458**      | 1.266±0.4136**      | 1.545±0.3296**      |
| 16 | 13.1 | Lyso-PE/22:6 | 7 | C <sub>22</sub> H <sub>32</sub> O <sub>2</sub> | C <sub>27</sub> H <sub>45</sub> NO <sub>7</sub> P | 0.04026±0.008481   | 0.01406±0.002679    | 0.09011±0.031**     | 0.1033±0.0442**     | 0.1256±0.03992**    |
| 17 | 13.8 | 22:6/Lyso-PE | 7 | C <sub>22</sub> H <sub>32</sub> O <sub>2</sub> | C <sub>27</sub> H <sub>45</sub> NO <sub>7</sub> P | 0.3399±0.07055     | 0.124±0.03465       | 1.095±0.2912**      | 1.163±0.3326**      | 1.313±0.2127**      |
| 18 | 14.4 | Lyso-PE/22:5 | 6 | C <sub>22</sub> H <sub>34</sub> O <sub>2</sub> | C <sub>27</sub> H <sub>47</sub> NO <sub>7</sub> P | 0.002298±0.001337  | 0.0007622±0.0003415 | 0.006778±0.002741** | 0.007458±0.003311** | 0.009008±0.004017** |
| 19 | 15.4 | 22:5/Lyso-PE | 6 | C <sub>22</sub> H <sub>34</sub> O <sub>2</sub> | C <sub>27</sub> H <sub>47</sub> NO <sub>7</sub> P | 0.01987±0.006932   | 0.004102±0.0008767  | 0.03384±0.01375**   | 0.04018±0.01013**   | 0.04462±0.02333**   |
| 20 | 16.4 | Lyso-PE/22:5 | 6 | C <sub>22</sub> H <sub>34</sub> O <sub>2</sub> | C <sub>27</sub> H <sub>47</sub> NO <sub>7</sub> P | 0.01367±0.001349   | 0.005255±0.003169   | 0.01246±0.006836    | 0.01786±0.003331*   | 0.02541±0.01564**   |
| 21 | 17.6 | 22:5/Lyso-PE | 6 | C <sub>22</sub> H <sub>34</sub> O <sub>2</sub> | C <sub>27</sub> H <sub>47</sub> NO <sub>7</sub> P | 0.01468±0.003144*  | 0.007528±0.003645   | 0.01486±0.003339*   | 0.01685±0.003313**  | 0.01864±0.008148**  |
| 22 | 18.7 | Lyso-PE/22:4 | 5 | C <sub>22</sub> H <sub>36</sub> O <sub>2</sub> | C <sub>27</sub> H <sub>49</sub> NO <sub>7</sub> P | 0.01214±0.002101** | 0.00391±0.001428    | 0.01279±0.002683**  | 0.01236±0.003016**  | 0.01447±0.004463**  |
| 23 | 20.4 | 22:4/Lyso-PE | 5 | C <sub>22</sub> H <sub>36</sub> O <sub>2</sub> | C <sub>27</sub> H <sub>49</sub> NO <sub>7</sub> P | 0.0195±0.007568    | 0.009907±0.004709   | 0.02185±0.007934*   | 0.02267±0.008686*   | 0.02318±0.009031*   |

### Lysophosphatidylserines (Lyso-PSs)

|   |      |              |   |                                                |                                                   |                     |                     |                    |                      |                       |
|---|------|--------------|---|------------------------------------------------|---------------------------------------------------|---------------------|---------------------|--------------------|----------------------|-----------------------|
| 1 | 12.0 | Lyso-PS/18:2 | 3 | C <sub>18</sub> H <sub>32</sub> O <sub>2</sub> | C <sub>24</sub> H <sub>45</sub> NO <sub>9</sub> P | 0.0005618±0.0001978 | 0.0003395±0.0001177 | 0.000503±0.0001782 | 0.0006093±0.0002358* | 0.0006815±0.0001032** |
| 2 | 13.0 | 18:2/Lyso-PS | 3 | C <sub>18</sub> H <sub>32</sub> O <sub>2</sub> | C <sub>24</sub> H <sub>45</sub> NO <sub>9</sub> P | 0.002874±0.0007464* | 0.001369±0.0002928  | 0.002063±0.000632  | 0.00283±0.001054*    | 0.002943±0.001066**   |
| 3 | 22.9 | Lyso-PS/18:0 | 1 | C <sub>18</sub> H <sub>36</sub> O <sub>2</sub> | C <sub>24</sub> H <sub>49</sub> NO <sub>9</sub> P | 0.009117±0.002271   | 0.007467±0.001963   | 0.007683±0.001151  | 0.007837±0.00278     | 0.006967±0.001942     |
| 4 | 26.8 | 18:0/Lyso-PS | 1 | C <sub>18</sub> H <sub>36</sub> O <sub>2</sub> | C <sub>24</sub> H <sub>49</sub> NO <sub>9</sub> P | 0.001673±0.0005518  | 0.001608±0.0007595  | 0.001655±0.0002507 | 0.00165±0.0005147    | 0.001585±0.0005972    |
| 5 | 13.2 | 20:4/Lyso-PS | 5 | C <sub>20</sub> H <sub>32</sub> O <sub>2</sub> | C <sub>26</sub> H <sub>45</sub> NO <sub>9</sub> P | 0.004568±0.0009482  | 0.003257±0.001281   | 0.002807±0.001249  | 0.004118±0.0009965   | 0.003895±0.0009666    |

### Lysophosphatidic acids (Lyso-PAs)

|   |      |              |   |                                                |                                                  |                    |                  |                  |                  |                  |
|---|------|--------------|---|------------------------------------------------|--------------------------------------------------|--------------------|------------------|------------------|------------------|------------------|
| 1 | 14.1 | 16:1/Lyso-PA | 2 | C <sub>16</sub> H <sub>30</sub> O <sub>2</sub> | C <sub>19</sub> H <sub>36</sub> O <sub>7</sub> P | 0.02727±0.008016** | 0.01298±0.002755 | 0.02053±0.006397 | 0.01988±0.003829 | 0.02045±0.002806 |
| 2 | 18.4 | Lyso-PA/16:0 | 1 | C <sub>16</sub> H <sub>32</sub> O <sub>2</sub> | C <sub>19</sub> H <sub>38</sub> O <sub>7</sub> P | 0.1475±0.03273**   | 0.05665±0.005656 | 0.05707±0.0153   | 0.0558±0.01394   | 0.05648±0.01209  |
| 3 | 20.3 | 16:0/Lyso-PA | 1 | C <sub>16</sub> H <sub>32</sub> O <sub>2</sub> | C <sub>19</sub> H <sub>38</sub> O <sub>7</sub> P | 1.051±0.1021**     | 0.3986±0.03626   | 0.3152±0.09081   | 0.2857±0.06424   | 0.315±0.06665    |
| 4 | 15.4 | Lyso-PA/18:2 | 3 | C <sub>18</sub> H <sub>32</sub> O <sub>2</sub> | C <sub>21</sub> H <sub>38</sub> O <sub>7</sub> P | 0.366±0.06182**    | 0.1924±0.02648   | 0.1725±0.03405   | 0.2667±0.04552*  | 0.2891±0.02297** |
| 5 | 16.6 | 18:2/Lyso-PA | 3 | C <sub>18</sub> H <sub>32</sub> O <sub>2</sub> | C <sub>21</sub> H <sub>38</sub> O <sub>7</sub> P | 2.785±0.3072**     | 1.484±0.2084     | 1.236±0.1305     | 1.471±0.1689     | 1.952±0.3858*    |

|    |      |              |   |                                                |                                                  |                    |                  |                    |                    |                    |
|----|------|--------------|---|------------------------------------------------|--------------------------------------------------|--------------------|------------------|--------------------|--------------------|--------------------|
| 6  | 21.8 | Lyso-PA/18:1 | 2 | C <sub>18</sub> H <sub>34</sub> O <sub>2</sub> | C <sub>21</sub> H <sub>40</sub> O <sub>7</sub> P | 0.03358±0.00597    | 0.03588±0.01034  | 0.03192±0.006455   | 0.03288±0.009942   | 0.0383±0.006709    |
| 7  | 24.0 | 18:1/Lyso-PA | 2 | C <sub>18</sub> H <sub>34</sub> O <sub>2</sub> | C <sub>21</sub> H <sub>40</sub> O <sub>7</sub> P | 0.2568±0.06757     | 0.2661±0.05671   | 0.2212±0.0405      | 0.2187±0.03796     | 0.242±0.05049      |
| 8  | 32.8 | Lyso-PA/18:0 | 1 | C <sub>18</sub> H <sub>36</sub> O <sub>2</sub> | C <sub>21</sub> H <sub>42</sub> O <sub>7</sub> P | 0.01653±0.006203   | 0.02477±0.005797 | 0.0268±0.003797    | 0.02937±0.006298   | 0.03038±0.009356   |
| 9  | 34.6 | 18:0/Lyso-PA | 1 | C <sub>18</sub> H <sub>36</sub> O <sub>2</sub> | C <sub>21</sub> H <sub>42</sub> O <sub>7</sub> P | 0.1978±0.04762**   | 0.1431±0.02947   | 0.1017±0.01722     | 0.1±0.02191        | 0.115±0.02074      |
| 10 | 15.7 | Lyso-PA/20:4 | 5 | C <sub>20</sub> H <sub>32</sub> O <sub>2</sub> | C <sub>23</sub> H <sub>38</sub> O <sub>7</sub> P | 0.08712±0.01263**  | 0.05118±0.01616  | 0.06267±0.009834   | 0.06602±0.01623    | 0.08003±0.02376*   |
| 11 | 16.7 | 20:4/Lyso-PA | 5 | C <sub>20</sub> H <sub>32</sub> O <sub>2</sub> | C <sub>23</sub> H <sub>38</sub> O <sub>7</sub> P | 0.6628±0.05009**   | 0.3689±0.07295   | 0.4168±0.09577     | 0.4367±0.06766     | 0.5185±0.1287*     |
| 12 | 18.8 | Lyso-PA/20:3 | 4 | C <sub>20</sub> H <sub>34</sub> O <sub>2</sub> | C <sub>23</sub> H <sub>40</sub> O <sub>7</sub> P | 0.01875±0.005198** | 0.01132±0.00251  | 0.01617±0.002896   | 0.01763±0.00265*   | 0.02502±0.002957** |
| 13 | 20.5 | 20:3/Lyso-PA | 4 | C <sub>20</sub> H <sub>34</sub> O <sub>2</sub> | C <sub>23</sub> H <sub>40</sub> O <sub>7</sub> P | 0.1367±0.02626**   | 0.08467±0.02147  | 0.1318±0.03252*    | 0.1495±0.02519**   | 0.1567±0.02865**   |
| 14 | 15.6 | Lyso-PA/22:6 | 7 | C <sub>22</sub> H <sub>32</sub> O <sub>2</sub> | C <sub>25</sub> H <sub>38</sub> O <sub>7</sub> P | 0.07628±0.01031**  | 0.03295±0.005171 | 0.05058±0.007975** | 0.05212±0.007017** | 0.07323±0.01176**  |
| 15 | 16.5 | 22:6/Lyso-PA | 7 | C <sub>22</sub> H <sub>32</sub> O <sub>2</sub> | C <sub>25</sub> H <sub>38</sub> O <sub>7</sub> P | 0.5463±0.09166**   | 0.2531±0.0267    | 0.247±0.05175      | 0.2829±0.08619     | 0.3588±0.04458*    |

### Lyso-phosphatidylinositols (Lyso-PIs)

|    |      |              |   |                                                |                                                   |                     |                   |                     |                     |                     |
|----|------|--------------|---|------------------------------------------------|---------------------------------------------------|---------------------|-------------------|---------------------|---------------------|---------------------|
| 1  | 11.2 | 16:1/Lyso-PI | 2 | C <sub>16</sub> H <sub>30</sub> O <sub>2</sub> | C <sub>25</sub> H <sub>46</sub> O <sub>12</sub> P | 0.004077±0.0007688  | 0.003883±0.001152 | 0.007573±0.001831** | 0.007397±0.002054** | 0.008162±0.002526** |
| 2  | 13.2 | Lyso-PI/16:0 | 1 | C <sub>16</sub> H <sub>32</sub> O <sub>2</sub> | C <sub>25</sub> H <sub>48</sub> O <sub>12</sub> P | 0.006187±0.001178   | 0.00481±0.001634  | 0.005173±0.001184   | 0.005413±0.001561   | 0.004997±0.001255   |
| 3  | 14.5 | 16:0/Lyso-PI | 1 | C <sub>16</sub> H <sub>32</sub> O <sub>2</sub> | C <sub>25</sub> H <sub>48</sub> O <sub>12</sub> P | 0.1053±0.03149      | 0.09111±0.0274    | 0.08339±0.01555     | 0.1039±0.02372      | 0.09899±0.01994     |
| 4  | 11.8 | Lyso-PI/18:2 | 3 | C <sub>18</sub> H <sub>32</sub> O <sub>2</sub> | C <sub>27</sub> H <sub>48</sub> O <sub>12</sub> P | 0.05788±0.0149**    | 0.03489±0.008538  | 0.0468±0.007296     | 0.05397±0.009288*   | 0.06219±0.01079**   |
| 5  | 12.6 | 18:2/Lyso-PI | 3 | C <sub>18</sub> H <sub>32</sub> O <sub>2</sub> | C <sub>27</sub> H <sub>48</sub> O <sub>12</sub> P | 0.4741±0.1181**     | 0.2829±0.04863    | 0.3121±0.05524      | 0.4407±0.1022*      | 0.4521±0.09337**    |
| 6  | 15.0 | Lyso-PI/18:1 | 2 | C <sub>18</sub> H <sub>34</sub> O <sub>2</sub> | C <sub>27</sub> H <sub>50</sub> O <sub>12</sub> P | 0.004658±0.001823** | 0.01571±0.002944  | 0.01259±0.003021    | 0.01321±0.001613    | 0.01532±0.004155    |
| 7  | 16.5 | 18:1/Lyso-PI | 2 | C <sub>18</sub> H <sub>34</sub> O <sub>2</sub> | C <sub>27</sub> H <sub>50</sub> O <sub>12</sub> P | 0.06924±0.0176**    | 0.1821±0.04788    | 0.1171±0.02165**    | 0.1168±0.02165**    | 0.1226±0.02127**    |
| 8  | 21.9 | Lyso-PI/18:0 | 1 | C <sub>18</sub> H <sub>36</sub> O <sub>2</sub> | C <sub>27</sub> H <sub>52</sub> O <sub>12</sub> P | 0.01735±0.0018      | 0.01944±0.005802  | 0.02002±0.002551    | 0.01805±0.002923    | 0.01525±0.001833    |
| 9  | 25.3 | 18:0/Lyso-PI | 1 | C <sub>18</sub> H <sub>36</sub> O <sub>2</sub> | C <sub>27</sub> H <sub>52</sub> O <sub>12</sub> P | 0.0179±0.002765     | 0.02033±0.006784  | 0.02037±0.00251     | 0.01717±0.002978    | 0.01671±0.003282    |
| 10 | 12.0 | Lyso-PI/20:4 | 5 | C <sub>20</sub> H <sub>32</sub> O <sub>2</sub> | C <sub>29</sub> H <sub>48</sub> O <sub>12</sub> P | 0.4003±0.1152       | 0.2988±0.02608    | 0.2975±0.07827      | 0.3168±0.03133      | 0.3409±0.06164      |
| 11 | 12.9 | 20:4/Lyso-PI | 5 | C <sub>20</sub> H <sub>32</sub> O <sub>2</sub> | C <sub>29</sub> H <sub>48</sub> O <sub>12</sub> P | 2.785±0.701         | 2.159±0.6106      | 1.936±0.1943        | 2.214±0.3322        | 2.436±0.3974        |
| 12 | 13.7 | Lyso-PI/20:3 | 4 | C <sub>20</sub> H <sub>34</sub> O <sub>2</sub> | C <sub>29</sub> H <sub>50</sub> O <sub>12</sub> P | 0.02116±0.005786    | 0.01386±0.003079  | 0.03389±0.006715**  | 0.04271±0.0088**    | 0.04752±0.008414**  |
| 13 | 14.9 | 20:3/Lyso-PI | 4 | C <sub>20</sub> H <sub>34</sub> O <sub>2</sub> | C <sub>29</sub> H <sub>50</sub> O <sub>12</sub> P | 0.2806±0.0694*      | 0.1731±0.02638    | 0.3209±0.07216**    | 0.3356±0.07869**    | 0.3853±0.08185**    |
| 14 | 12.1 | Lyso-PI/22:6 | 7 | C <sub>22</sub> H <sub>32</sub> O <sub>2</sub> | C <sub>31</sub> H <sub>48</sub> O <sub>12</sub> P | 0.01579±0.004933*   | 0.007668±0.001618 | 0.01669±0.004327**  | 0.01726±0.004916**  | 0.02191±0.006354**  |

|    |      |              |   |                                                |                                                   |                    |                   |                   |                    |                    |
|----|------|--------------|---|------------------------------------------------|---------------------------------------------------|--------------------|-------------------|-------------------|--------------------|--------------------|
| 15 | 12.8 | 22:6/Lyso-PI | 7 | C <sub>22</sub> H <sub>32</sub> O <sub>2</sub> | C <sub>31</sub> H <sub>48</sub> O <sub>12</sub> P | 0.1194±0.04834*    | 0.05013±0.009484  | 0.1099±0.02994*   | 0.1222±0.02776**   | 0.1401±0.05198**   |
| 16 | 14.1 | 22:5/Lyso-PI | 6 | C <sub>22</sub> H <sub>34</sub> O <sub>2</sub> | C <sub>31</sub> H <sub>50</sub> O <sub>12</sub> P | 0.02973±0.006232** | 0.007781±0.001765 | 0.01638±0.004542* | 0.02335±0.006947** | 0.02598±0.005794** |
| 17 | 16.0 | Lyso-PI/22:5 | 6 | C <sub>22</sub> H <sub>34</sub> O <sub>2</sub> | C <sub>31</sub> H <sub>50</sub> O <sub>12</sub> P | 0.02243±0.005896*  | 0.01282±0.001911  | 0.01424±0.005949  | 0.02189±0.007586*  | 0.02823±0.006286** |
| 18 | 16.5 | Lyso-PI/22:4 | 5 | C <sub>22</sub> H <sub>36</sub> O <sub>2</sub> | C <sub>31</sub> H <sub>52</sub> O <sub>12</sub> P | 0.004698±0.0006525 | 0.005012±0.00154  | 0.004733±0.001726 | 0.006103±0.001916  | 0.00641±0.002661   |
| 19 | 18.2 | 22:4/Lyso-PI | 5 | C <sub>22</sub> H <sub>36</sub> O <sub>3</sub> | C <sub>31</sub> H <sub>52</sub> O <sub>12</sub> P | 0.008781±0.005495  | 0.007908±0.003069 | 0.007574±0.003573 | 0.00812±0.005216   | 0.01036±0.007013   |

#### Lysophosphatidylglycerols (Lyso-PGs)

|   |      |              |   |                                                |                                                  |                   |                    |                    |                    |                    |
|---|------|--------------|---|------------------------------------------------|--------------------------------------------------|-------------------|--------------------|--------------------|--------------------|--------------------|
| 1 | 14.0 | Lysp-PG/18:2 | 3 | C <sub>18</sub> H <sub>32</sub> O <sub>2</sub> | C <sub>24</sub> H <sub>44</sub> O <sub>9</sub> P | 0.01128±0.002133* | 0.004562±0.0008089 | 0.02252±0.005046** | 0.02283±0.005976** | 0.02586±0.004276** |
| 2 | 15.2 | 18:2/Lyso-PG | 3 | C <sub>18</sub> H <sub>32</sub> O <sub>2</sub> | C <sub>24</sub> H <sub>44</sub> O <sub>9</sub> P | 0.07719±0.01764*  | 0.0295±0.008874    | 0.1288±0.02768**   | 0.1429±0.05025**   | 0.1517±0.03205**   |
| 3 | 18.9 | Lysp-PG/18:1 | 2 | C <sub>18</sub> H <sub>34</sub> O <sub>2</sub> | C <sub>24</sub> H <sub>46</sub> O <sub>9</sub> P | 0.01107±0.00271   | 0.00973±0.001938   | 0.02632±0.006174** | 0.02649±0.007835** | 0.0297±0.006458**  |
| 4 | 21.3 | 18:1/Lyso-PG | 2 | C <sub>18</sub> H <sub>34</sub> O <sub>2</sub> | C <sub>24</sub> H <sub>46</sub> O <sub>9</sub> P | 0.04309±0.01216   | 0.03019±0.009613   | 0.09267±0.02109**  | 0.09422±0.0218**   | 0.1016±0.0197**    |
| 5 | 30.0 | Lysp-PG/18:0 | 1 | C <sub>18</sub> H <sub>36</sub> O <sub>2</sub> | C <sub>24</sub> H <sub>48</sub> O <sub>9</sub> P | 0.01362±0.002515  | 0.01505±0.003135   | 0.01403±0.002221   | 0.01366±0.002899   | 0.01282±0.003148   |
| 6 | 32.6 | 18:0/Lyso-PG | 1 | C <sub>18</sub> H <sub>36</sub> O <sub>2</sub> | C <sub>24</sub> H <sub>48</sub> O <sub>9</sub> P | 0.01076±0.004443  | 0.009097±0.00185   | 0.01241±0.003105   | 0.01185±0.001981   | 0.01202±0.002777   |

\* $P < 0.05$ , \*\* $P < 0.01$  significantly different from group **M** (hyperlipidemia).

The Lyso-GPLs were quantified by LC-QTRAP-MRM in positive mode (Lyso-PC, Lyso-PE, Lyso-PS) and negative (Lyso-PA, Lyso-PI, Lyso-PG) mode, respectively.

Abbreviation: **C**, normal control group; **M**, model group; **K<sub>L</sub>**, low dose; **K<sub>M</sub>**, medium dose; **K<sub>H</sub>**, high dose.
