# Supplementary material for: The metabolic change in serum lysoglycerophospholipids intervened by triterpenoid saponins from Kuding tea on hyperlipidemic mice
Source: Royal Society of Chemistry journal article supplement (doi:10.1039/c9fo02142f), 2019-01-01
Supplement: c9fo02142f6.pdf [file c9fo02142f6.pdf]

**Table S3. The relative quantitative of Lyso-GPLs stratified by degree of unsaturation in fatty acyl group (mean  $\pm$  SD, n = 8).**

| <b>RDB</b> | <b>C group</b>      | <b>M group</b>    | <b>K<sub>L</sub> group</b> | <b>K<sub>M</sub> group</b> | <b>K<sub>H</sub> group</b> |
|------------|---------------------|-------------------|----------------------------|----------------------------|----------------------------|
| 0          | 25.27 $\pm$ 2.01    | 22.36 $\pm$ 2.51  | 32.52 $\pm$ 2.84**         | 34.89 $\pm$ 4.03**         | 37.41 $\pm$ 3.14**         |
|            | 48.62%              | 51.16%            | 44.21%                     | 42.80%                     | 41.72%                     |
| 1          | 5.77 $\pm$ 0.55     | 6.13 $\pm$ 1.16   | 13.45 $\pm$ 2.26**         | 15.14 $\pm$ 2.328**        | 16.21 $\pm$ 1.906**        |
|            | 11.11%              | 14.03%            | 18.29%                     | 18.57%                     | 18.08%                     |
| 2          | 8.12 $\pm$ 0.76     | 6.31 $\pm$ 0.46   | 9.67 $\pm$ 1.60**          | 11.70 $\pm$ 1.40**         | 13.03 $\pm$ 2.08**         |
|            | 15.62%              | 14.44%            | 13.14%                     | 14.35%                     | 14.53%                     |
| 3          | 2.03 $\pm$ 0.35     | 2.07 $\pm$ 0.54   | 5.12 $\pm$ 0.48**          | 5.48 $\pm$ 0.65**          | 6.15 $\pm$ 1.13**          |
|            | 3.90%               | 4.74%             | 6.97%                      | 6.72%                      | 6.86%                      |
| 4          | 6.31 $\pm$ 1.02*    | 4.93 $\pm$ 0.76   | 7.87 $\pm$ 0.89**          | 8.72 $\pm$ 0.65**          | 10.06 $\pm$ 0.70**         |
|            | 12.15%              | 11.28%            | 10.70%                     | 10.69%                     | 11.22%                     |
| 5          | 2.54 $\pm$ 0.58**   | 1.02 $\pm$ 0.16   | 2.71 $\pm$ 0.42**          | 3.22 $\pm$ 0.47**          | 3.98 $\pm$ 0.42**          |
|            | 4.88%               | 2.34%             | 3.68%                      | 3.95%                      | 4.44%                      |
| 6          | 1.77 $\pm$ 0.24**   | 0.80 $\pm$ 0.098  | 2.07 $\pm$ 0.35**          | 2.23 $\pm$ 0.33**          | 2.62 $\pm$ 0.34**          |
|            | 3.41%               | 1.84%             | 2.81%                      | 2.73%                      | 2.92%                      |
| 7          | 0.16 $\pm$ 0.0088** | 0.072 $\pm$ 0.022 | 0.15 $\pm$ 0.046**         | 0.16 $\pm$ 0.014**         | 0.21 $\pm$ 0.031**         |
|            | 0.31%               | 0.17%             | 0.20%                      | 0.19%                      | 0.23%                      |

\* $P < 0.01$ , \*\* $P < 0.05$  significantly different from group M.

Abbreviation: **C**, normal control; **M**, model; **K<sub>L</sub>**, low dose; **K<sub>M</sub>**, medium dose; **K<sub>H</sub>**, high dose; **RDB**, Ring Double Bond Equivalents.
