# Supplementary material for: The metabolic change in serum lysoglycerophospholipids intervened by triterpenoid saponins from Kuding tea on hyperlipidemic mice
Source: Royal Society of Chemistry journal article supplement (doi:10.1039/c9fo02142f), 2019-01-01
Supplement: c9fo02142f7.pdf [file c9fo02142f7.pdf]

**Table S4.** The relative quantitative of different degree of unsaturation of Lyso-GPLs in mice serum (mean  $\pm$  SD, n = 8).

| RDB           | C group                      | M group                    | K <sub>L</sub> group         | K <sub>M</sub> group        | K <sub>H</sub> group         |
|---------------|------------------------------|----------------------------|------------------------------|-----------------------------|------------------------------|
| <b>LysoPA</b> |                              |                            |                              |                             |                              |
| 0             | 1.39 $\pm$ 0.13**<br>21.78%  | 0.62 $\pm$ 0.036<br>18.23% | 0.50 $\pm$ 0.12<br>16.11%    | 0.47 $\pm$ 0.094*<br>13.51% | 0.52 $\pm$ 0.093<br>12.1%    |
| 1             | 0.32 $\pm$ 0.079<br>4.97%    | 0.31 $\pm$ 0.069<br>9.22%  | 0.27 $\pm$ 0.052<br>8.8%     | 0.27 $\pm$ 0.049<br>7.79%   | 0.30 $\pm$ 0.052<br>7.04%    |
| 2             | 3.15 $\pm$ 0.36**<br>49.33%  | 1.68 $\pm$ 0.23<br>49.08%  | 1.41 $\pm$ 0.13<br>45.33%    | 1.74 $\pm$ 0.19<br>49.87%   | 2.24 $\pm$ 0.40**<br>52.47%  |
| 3             | 0.16 $\pm$ 0.025**<br>2.43%  | 0.096 $\pm$ 0.023<br>2.81% | 0.15 $\pm$ 0.035*<br>4.76%   | 0.17 $\pm$ 0.024**<br>4.79% | 0.18 $\pm$ 0.029**<br>4.25%  |
| 4             | 0.75 $\pm$ 0.054**<br>11.74% | 0.42 $\pm$ 0.072<br>12.29% | 0.48 $\pm$ 0.98<br>15.43%    | 0.50 $\pm$ 0.076<br>14.42%  | 0.60 $\pm$ 0.15*<br>14.01%   |
| 6             | 0.62 $\pm$ 0.092**<br>9.75%  | 0.29 $\pm$ 0.024<br>8.37%  | 0.30 $\pm$ 0.054<br>9.57%    | 0.34 $\pm$ 0.087<br>9.61%   | 0.43 $\pm$ 0.041**<br>10.11% |
| <b>LysoPI</b> |                              |                            |                              |                             |                              |
| 0             | 0.15 $\pm$ 0.032<br>3.30%    | 0.14 $\pm$ 0.040<br>4.00%  | 0.13 $\pm$ 0.018<br>3.81%    | 0.14 $\pm$ 0.026<br>3.72%   | 0.14 $\pm$ 0.022<br>3.20%    |
| 1             | 0.078 $\pm$ 0.019**<br>1.75% | 0.20 $\pm$ 0.050<br>5.94%  | 0.14 $\pm$ 0.023**<br>4.06%  | 0.14 $\pm$ 0.023**<br>3.53% | 0.15 $\pm$ 0.023*<br>3.44%   |
| 2             | 0.53 $\pm$ 0.13**<br>11.96%  | 0.32 $\pm$ 0.054<br>9.36%  | 0.36 $\pm$ 0.057<br>10.60%   | 0.50 $\pm$ 0.11*<br>12.72%  | 0.51 $\pm$ 0.10**<br>12.12%  |
| 3             | 0.30 $\pm$ 0.073*<br>6.78%   | 0.19 $\pm$ 0.025<br>5.51%  | 0.35 $\pm$ 0.073**<br>10.48% | 0.38 $\pm$ 0.087**<br>9.73% | 0.43 $\pm$ 0.09**<br>10.20%  |
| 4             | 3.20 $\pm$ 0.80<br>72.00%    | 2.47 $\pm$ 0.61<br>72.87%  | 2.25 $\pm$ 0.12<br>66.41%    | 2.55 $\pm$ 0.33<br>65.56%   | 2.80 $\pm$ 0.45<br>65.94%    |
| 5             | 0.052 $\pm$ 0.0085**         | 0.021 $\pm$ 0.0026         | 0.031 $\pm$ 0.0079**         | 0.045 $\pm$ 0.0048**        | 0.054 $\pm$ 0.012**          |

|               |                            |                          |                          |                            |                            |
|---------------|----------------------------|--------------------------|--------------------------|----------------------------|----------------------------|
|               | 1.17%                      | 0.61%                    | 0.90%                    | 1.16%                      | 1.28%                      |
| 6             | 0.14±0.053**<br>3.04%      | 0.058±0.010<br>1.70%     | 0.13±0.030*<br>3.74%     | 0.14±0.025**<br>3.58%      | 0.16±0.058**<br>3.82%      |
| <b>LysoPG</b> |                            |                          |                          |                            |                            |
| 0             | 0.024±0.0059<br>14.60%     | 0.024±0.0037<br>24.61%   | 0.026±0.0043<br>8.91%    | 0.026±0.0042<br>8.18%      | 0.025±0.0045<br>7.44%      |
| 1             | 0.054±0.013<br>32.43%      | 0.040±0.011<br>40.68%    | 0.12±0.027**<br>40.10%   | 0.12±0.029**<br>38.70%     | 0.13±0.026**<br>39.34%     |
| 2             | 0.088±0.019*<br>52.97%     | 0.034±0.0092<br>34.71%   | 0.15±0.033**<br>50.99%   | 0.17±0.056**<br>53.13%     | 0.18±0.036**<br>53.22%     |
| <b>LysoPS</b> |                            |                          |                          |                            |                            |
| 0             | 0.011±0.0020<br>57.41%     | 0.0091±0.0021<br>64.63%  | 0.0093±0.0012<br>63.47%  | 0.0095±0.0028<br>55.66%    | 0.0086±0.0023<br>53.22%    |
| 2             | 0.0034±0.00091**<br>18.29% | 0.0017±0.00033<br>12.18% | 0.0026±0.00064<br>17.45% | 0.0034±0.00095**<br>20.18% | 0.0036±0.00097**<br>22.55% |
| 4             | 0.0046±0.00095<br>24.30%   | 0.0033±0.0013<br>23.19%  | 0.0028±0.0012<br>19.08%  | 0.0041±0.0010<br>24.16%    | 0.0039±0.00097<br>24.24%   |
| <b>LysoPE</b> |                            |                          |                          |                            |                            |
| 0             | 7.54±1.22<br>66.52%        | 5.63±0.59<br>70.93%      | 8.30±1.46**<br>43.73%    | 8.94±2.11**<br>41.86%      | 9.39±1.08**<br>39.89%      |
| 1             | 0.64±0.14<br>5.71%         | 0.73±0.21<br>9.13%       | 2.37±0.55**<br>12.48%    | 2.47±0.86**<br>11.41%      | 2.53±0.77**<br>10.74%      |
| 2             | 1.66±0.40<br>14.65%        | 0.79±0.42<br>9.88%       | 2.85±1.16*<br>15.02%     | 4.10±1.70**<br>19.17%      | 4.46±1.71**<br>18.92%      |
| 3             | 0.24±0.060<br>2.14%        | 0.14±0.045<br>1.76%      | 1.26±0.33**<br>6.62%     | 1.35±0.42**<br>6.31%       | 1.64±0.36**<br>6.96%       |
| 4             | 0.81±0.19<br>7.18%         | 0.50±0.11<br>6.33%       | 2.95±0.66**<br>15.54%    | 3.19±0.61**<br>14.94%      | 3.99±0.58**<br>16.97%      |

|               |                        |                       |                        |                        |                        |
|---------------|------------------------|-----------------------|------------------------|------------------------|------------------------|
| 5             | 0.051±0.0079<br>0.45%  | 0.018±0.0067<br>0.22% | 0.068±0.023**<br>0.36% | 0.082±0.013**<br>0.39% | 0.098±0.050**<br>0.41% |
| 6             | 0.38±0.074<br>3.36%    | 0.14±0.037<br>1.74%   | 1.19±0.32**<br>6.25%   | 1.27±0.33**<br>5.93%   | 1.44±0.23**<br>6.11%   |
| <b>LysoPC</b> |                        |                       |                        |                        |                        |
| 0             | 16.14±2.399<br>54.53%  | 15.93±1.95<br>55.24%  | 23.56±2.66**<br>49.31% | 25.29±3.25**<br>48.22% | 27.33±3.01**<br>47.73% |
| 1             | 4.68±0.67<br>15.8%     | 4.85±1.10<br>16.82%   | 10.55±2.04**<br>22.08% | 12.17±1.91**<br>23.20% | 13.10±1.90**<br>22.88% |
| 2             | 2.69±0.65<br>9.07%     | 3.50±0.48<br>12.13%   | 4.90±0.80*<br>10.25%   | 5.20±1.28**<br>9.92%   | 5.63±0.86**<br>9.84%   |
| 3             | 1.32±0.31<br>4.49%     | 1.65±0.52<br>5.72%    | 3.37±0.31**<br>7.04%   | 3.58±0.52**<br>6.83%   | 3.90±0.77**<br>6.81%   |
| 4             | 1.54±0.32<br>5.21%     | 1.53±0.34<br>5.31%    | 2.2±0.63*<br>4.59%     | 2.47±0.41**<br>4.71%   | 2.67±0.30**<br>4.66%   |
| 5             | 2.44±0.59**<br>8.23%   | 0.99±0.16<br>3.42%    | 2.61±0.42**<br>5.46%   | 3.09±0.48**<br>5.89%   | 3.83±0.40**<br>6.69%   |
| 6             | 0.63±0.19**<br>2.14%   | 0.32±0.066<br>1.12%   | 0.46±0.096<br>0.95%    | 0.48±0.088<br>0.92%    | 0.59±0.13**<br>1.03%   |
| 7             | 0.16±0.0088**<br>0.54% | 0.072±0.022<br>0.25%  | 0.15±0.046**<br>0.31%  | 0.16±0.014**<br>0.30%  | 0.21±0.031**<br>0.36%  |

\* $P < 0.01$ , \*\* $P < 0.05$  significantly different from group **M**.

Abbreviation: **C**, normal control; **M**, model; **K<sub>L</sub>**, low dose; **K<sub>M</sub>**, medium dose; **K<sub>H</sub>**, high dose; **RDB**, Ring Double Bond Equivalents.
