# Supplementary material for: The metabolic change in serum lysoglycerophospholipids intervened by triterpenoid saponins from Kuding tea on hyperlipidemic mice
Source: Royal Society of Chemistry journal article supplement (doi:10.1039/c9fo02142f), 2019-01-01
Supplement: c9fo02142f8.pdf [file c9fo02142f8.pdf]

**Table S5. The relative quantitative of different number of C atom in fatty acyl group of Lyso-GPLs in mice serum (mean ± SD, n = 8).**

| No. of C | C group              | M group              | K <sub>L</sub> group   | K <sub>M</sub> group    | K <sub>H</sub> group   |
|----------|----------------------|----------------------|------------------------|-------------------------|------------------------|
| 14       | 0.22±0.041<br>0.43%  | 0.17±0.034<br>0.40%  | 0.28±0.081*<br>0.39%   | 0.35±0.048**<br>0.43%   | 0.42±0.096**<br>0.47%  |
| 15       | 1.14±0.15*<br>2.19%  | 0.70±0.14<br>1.59%   | 1.38±0.31**<br>1.88%   | 1.75±0.45**<br>2.15%    | 1.82±0.23**<br>2.03%   |
| 16       | 8.82±0.63<br>16.97%  | 7.12±0.87<br>16.30%  | 10.50±1.01**<br>14.28% | 11.57±1.42**<br>14.19%  | 12.75±2.39**<br>14.22% |
| 17       | 3.45±0.43<br>6.63%   | 2.99±0.47<br>6.83%   | 4.96±1.20**<br>6.75%   | 5.32±1.03**<br>6.53%    | 6.12±0.48**<br>6.82%   |
| 18       | 16.91±0.88<br>32.53% | 15.18±1.01<br>34.73% | 20.58±2.52**<br>27.98% | 22.87±3.33**<br>28.06%  | 24.38±3.99**<br>27.19% |
| 19       | 3.71±1.41<br>7.13%   | 3.29±1.06<br>7.53%   | 6.63±1.53**<br>9.01%   | 6.85±1.30**<br>8.40%    | 7.67±1.44**<br>8.55%   |
| 20       | 13.17±0.93<br>25.34% | 11.95±1.69<br>27.34% | 24.54±2.99**<br>33.37% | 27.64±2.336**<br>33.91% | 30.58±3.03**<br>34.11% |
| 22       | 4.45±0.74**<br>8.56% | 2.22±0.26<br>5.08%   | 4.53±0.68**<br>6.16%   | 5.01±0.39**<br>6.15%    | 5.75±0.78**<br>6.41%   |
| 24       | 0.11±0.026<br>0.21%  | 0.088±0.014<br>0.20% | 0.14±0.013**<br>0.19%  | 0.15±0.019**<br>0.19%   | 0.17±0.016**<br>0.19%  |

\* $P < 0.01$ , \*\* $P < 0.05$  significantly different from group **M**.

Abbreviation: **C**, normal control; **M**, model; **K<sub>L</sub>**, low dose; **K<sub>M</sub>**, medium dose; **K<sub>H</sub>**, high dose; **RDB**, Ring Double Bond Equivalents.
