# Supplementary figures and images for: The metabolic change in serum lysoglycerophospholipids intervened by triterpenoid saponins from Kuding tea on hyperlipidemic mice
Source: Royal Society of Chemistry journal article supplement (doi:10.1039/c9fo02142f), 2019-01-01

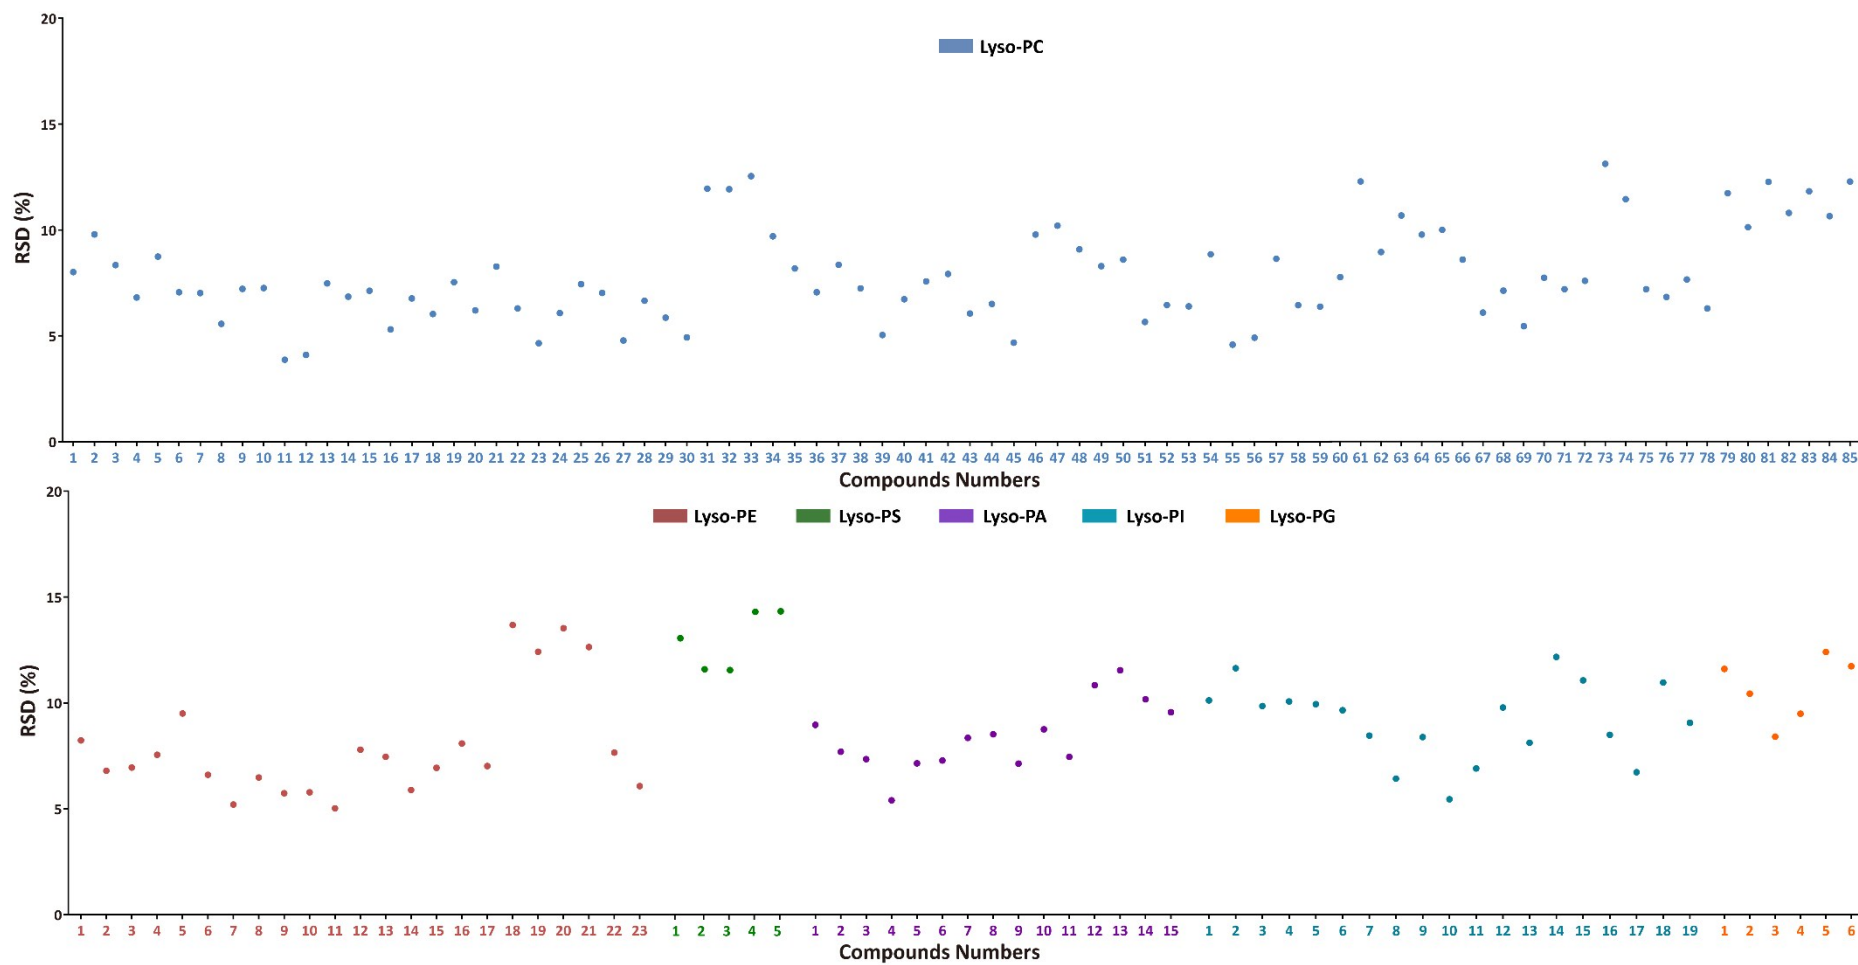

**Figure S3.** The RSD values of 153 Lyso-GPLs in QC samples.

Supplement: c9fo02142f3.pdf [file c9fo02142f3.pdf]
